# Supplementary material
Source: bioRxiv or medRxiv preprint supplement (https://www.biorxiv.org/highwire/filestream/61029/field_highwire_adjunct_files/0/199240-1.pdf)

**Supplementary Note**  
**Compound synthesis protocols and characterization**  
**Development of a riboswitch-based platform for live cell imaging of RNAs**  
**in mammalian cells**

|      |                                                                              |    |
|------|------------------------------------------------------------------------------|----|
| 1.   | General Information .....                                                    | 2  |
| 2.   | Synthesis of cobalamin azides .....                                          | 2  |
| 2.1  | Cbl-N <sub>3</sub> .....                                                     | 2  |
| 2.2  | Cbl-C6-N <sub>3</sub> .....                                                  | 3  |
| 2.3  | Cbl-1xPEG-N <sub>3</sub> .....                                               | 3  |
| 2.4  | Cbl-2xPEG-N <sub>3</sub> .....                                               | 3  |
| 2.5  | Cbl-3xPEG-N <sub>3</sub> .....                                               | 5  |
| 2.6  | Cbl-5xPEG-N <sub>3</sub> .....                                               | 5  |
| 3.   | Synthesis of Cbl conjugates with various dyes .....                          | 6  |
| 3.1  | Cbl-FAM.....                                                                 | 6  |
| 3.2  | Cbl-C6-FAM.....                                                              | 7  |
| 3.3  | Cbl-1xPEG-FAM .....                                                          | 9  |
| 3.4  | Cbl-2xPEG-FAM .....                                                          | 10 |
| 3.5  | Cbl-3xPEG-FAM .....                                                          | 11 |
| 3.6  | Cbl-Cy5.....                                                                 | 12 |
| 3.7  | Cbl-C6-ATTO 488.....                                                         | 13 |
| 3.8  | Cbl-ATTO 590.....                                                            | 14 |
| 3.9  | Cbl-C6-ATTO 590.....                                                         | 15 |
| 3.10 | Cbl-5xPEG-ATTO 590.....                                                      | 16 |
| 3.11 | Cbl-ATTO 633.....                                                            | 17 |
| 3.12 | Cbl-C6-ATTO 633.....                                                         | 18 |
| 4.   | NMR spectra.....                                                             | 20 |
| 4.1  | NMR spectra of Cbl-2xPEG-N <sub>3</sub> recorded in CD <sub>3</sub> OD ..... | 20 |
| 4.2  | NMR spectra of Cbl-5xPEG-N <sub>3</sub> recorded in CD <sub>3</sub> OD ..... | 22 |
| 4.3  | NMR spectra of Cbl-FAM recorded in CD <sub>3</sub> OD .....                  | 24 |
| 4.4  | NMR spectra of Cbl-C6-FAM recorded in CD <sub>3</sub> OD .....               | 26 |
| 4.5  | NMR spectra of Cbl-1xPEG-FAM recorded in CD <sub>3</sub> OD.....             | 28 |
| 4.6  | NMR spectra of Cbl-2xPEG-FAM recorded in CD <sub>3</sub> OD.....             | 30 |
| 4.7  | NMR spectra of Cbl-3xPEG-FAM recorded in CD <sub>3</sub> OD.....             | 32 |
| 5.   | MS spectra.....                                                              | 34 |
| 5.1  | MS spectrum of Cbl-ATTO633 .....                                             | 34 |
| 5.2  | MS spectrum of Cbl-C6-ATTO633 .....                                          | 35 |

## 1. General Information

Commercially available reagents and solvents were used as received. 6-FAM alkyne and sulfo-Cyanine5 alkyne were purchased from Lumiprobe and ATTO propargylamides were obtained from ATTO-TEC. The structure of ATTO 633 alkyne was not provided by the producer, hence it is not included on schemes.

$^1\text{H}$  and  $^{13}\text{C}$  NMR spectra were recorded on a Bruker 500 MHz or Varian 500 MHz spectrometer with the residual solvent peak used as an internal standard. Data are reported as follows: chemical shift [ppm], multiplicity (s = singlet, bs = broad singlet, d = doublet, t = triplet, q = quartet, m = multiplet), coupling constant and integration. HRMS spectra were recorded on a spectrometer with TOF mass analyzer.

The scale of the reactions with ATTO and Cyanine dyes did not provide sufficient amount of products for NMR analyses thus the HPLC and MS analyses were performed to characterize those compounds. For Cbl-1xPEG-FAM, Cbl-2xPEG-FAM and Cbl-3xPEG-FAM signals in  $^1\text{H}$  NMR spectra recorded in  $\text{CD}_3\text{OD}$  were much broader comparing to Cbl-FAM and Cbl-C6-FAM and subtle structure of multipletes or integrations could not be fully distinguished.

Preparative chromatography was performed using LiChroprep® RP-18 gel (Merck) with redistilled water and HPLC grade MeCN as eluents. Progress of the reactions was monitored using RP-HPLC techniques. HPLC measurement conditions: column, Eurospher II 100-5, C18, 250 mm  $\times$  4.6 mm with a precolumn or Kromasil C18 5  $\mu\text{m}$  250 mm  $\times$  4.0 mm; detection, UV/vis; pressure, 10 MPa; temperature, 30°C; flow rate, 1 mL/min; wavelengths and HPLC methods are listed for each compound.

Abbreviations: CDT – 1,1'-Carbonyl-di-(1,2,4-triazole); RP HPLC – Reverse-phase high-performance liquid chromatography; TBTA – Tris[(1-benzyl-1H-1,2,3-triazol-4-yl)methyl]amine; TEA – Triethylamine

## 2. Synthesis of cobalamin azide

### 2.1 Cbl- $\text{N}_3$

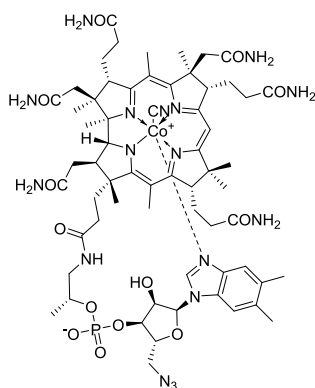

Compound was synthesized according to the procedure described in *Chem. Eur. J.*, **19**, 5141 – 5148 (2013). All spectra matched that reported in the literature.

## 2.2 Cbl-C6-N<sub>3</sub>

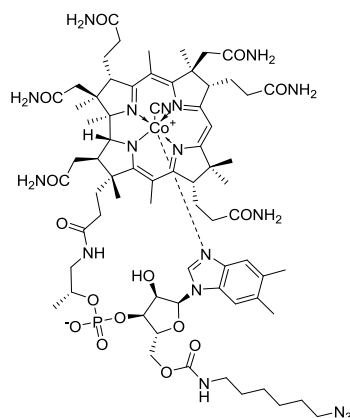

Compound was synthesized according to the procedure described in *J. Porphyrins Phthalocyanines*, **17**, 110-117 (20122013). All spectra matched those reported in the literature.

## 2.3 Cbl-1xPEG-N<sub>3</sub>

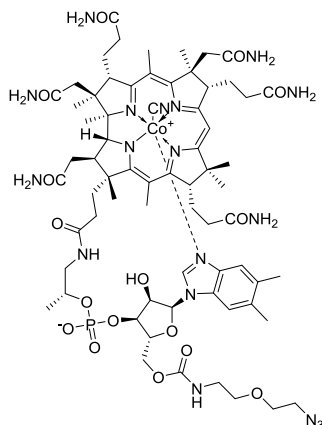

Compound was synthesized according to the procedure described in *J. Porphyrins Phthalocyanines*, **17**, 110-117 (20122013). All spectra matched those reported in the literature.

## 2.4 Cbl-2xPEG-N<sub>3</sub>

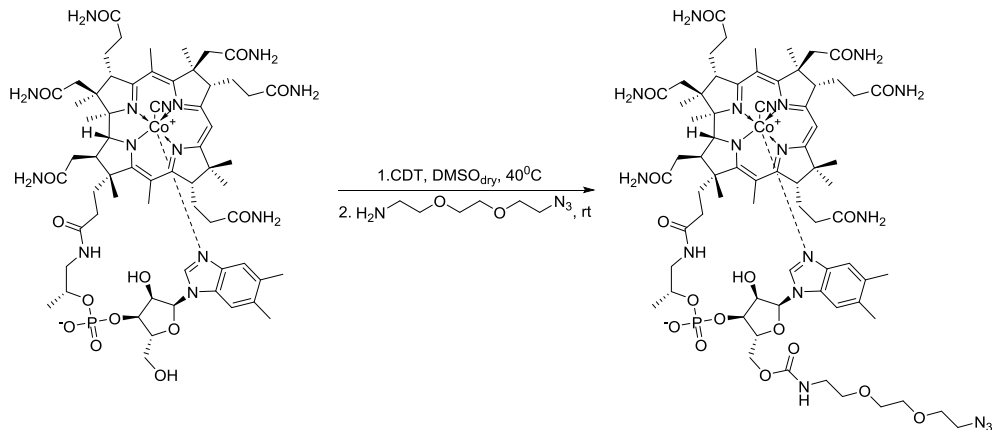

**Cbl-2xPEG-N<sub>3</sub>**: Cobalamin (0.075 mmol, 100 mg) was dissolved in dry DMSO (2.5 mL) at 40 °C under an argon atmosphere. To a stirring solution under argon solid CDT (50 mg, 0.30 mmol) was added. When full consumption of the substrate (monitored by the RP HPLC) was observed (approx. 1.5 h), heating bath was removed and 2-[2-(2-azidoethoxy)ethoxy]-ethanamine (100 µL) was added in one portion. The resulting solution was stirred overnight, then the reaction mixture was poured into AcOEt (50 mL), and centrifuged. The precipitate was washed twice with Et<sub>2</sub>O (2 x 15mL). After drying it was dissolved in water and purified by RP column chromatography (80 mL) with a mixture of MeCN and H<sub>2</sub>O as eluents (10% v/v). The desired compound was obtained as a red powder; yield: 66% (0.0495 mmol, 77 mg). <sup>1</sup>H NMR (500 MHz, CD<sub>3</sub>OD) δ 7.25 (s, 1H), 7.15 (s, 1H), 6.58 (s, 1H), 6.23 (d, *J* = 2.6 Hz, 1H), 6.04 (s, 1H) 4.66 (d, *J* = 9.9 Hz, 1H), 4.51 (d, *J* = 8.2 Hz, 1H), 4.40 – 4.32 (m, 1H), 4.24 – 4.20 (m, 2H), 4.17 (dd, *J* = 12.2, 2.4 Hz, 1H), 4.13 (d, *J* = 11.5 Hz, 1H), 3.60 – 3.67 (m, 7H), 3.54 (t, *J* = 5.6 Hz, 2H), 3.36 (t, *J* = 5.6 Hz, 2H), 2.93 – 2.85 (m, 2H), 2.59 (s, 3H), 2.58 (s, 3H), 2.67 – 2.42 (m, 12H), 2.41 – 2.34 (m, 2H), 2.29 (s, 3H), 2.28 (s, 3H), 2.21 – 2.14 (m, 1H), 2.12 – 1.96 (m, 4H), 1.94 – 1.82 (m, 3H), 1.89 (s, 3H), 1.77 – 1.70 (m, 1H), 1.47 (m, 3H), 1.39 (s, 3H), 1.39 – 1.37 (m, 2H), 1.37 (s, 3H), 1.30 – 1.26 (m, 1H), 1.25 (d, *J* = 6.3 Hz, 3H), 1.19 (s, 3H), 1.16 – 1.08 (m, 1H), 0.47 (s, 3H). <sup>13</sup>C NMR (126 MHz, CD<sub>3</sub>OD) δ 180.1, 178.7, 176.1, 176.0, 175.9, 175.1, 174.1, 174.1, 173.8, 173.2, 172.6, 165.7, 165.5, 157.2, 141.9, 136.8, 134.2, 132.5, 129.9, 116.5, 111.0, 107.3, 103.8, 94.2, 86.8, 85.0, 79.9, 74.9, 73.7, 72.0, 72.0, 70.1, 70.0, 69.7, 69.6, 69.1, 62.8, 58.9, 56.2, 55.5, 53.6, 51.1, 50.3, 45.2, 42.5, 41.6, 40.4, 38.7, 34.8, 33.7, 31.8, 31.5, 31.2, 30.9, 30.9, 28.1, 26.0, 25.9, 19.5, 19.1, 19.0, 18.9, 18.7, 18.7, 18.5, 16.1, 15.7, 14.9, 14.7. UV/vis (H<sub>2</sub>O) λ<sub>max</sub> (nm) (ε, L mol<sup>-1</sup> cm<sup>-1</sup>) 551 (7.8 × 10<sup>3</sup>), 522 (6.8 × 10<sup>3</sup>), 361 (2.4 × 10<sup>4</sup>), 278 (1.3 × 10<sup>4</sup>), 222 (4.2 × 10<sup>4</sup>). HRMS (ESI) *m/z* [M + Na]<sup>+</sup> calcd for C<sub>70</sub>H<sub>100</sub>N<sub>18</sub>O<sub>17</sub>PCoNa 1577.6481, found 1577.6455. Anal. calcd for C<sub>70</sub>H<sub>100</sub>N<sub>18</sub>O<sub>17</sub>PCo · 6H<sub>2</sub>O: C, 50.54; H, 6.79; N, 15.15. Found: C, 50.62; H, 7.03; N, 14.95.

#### HPLC Method:

| Time [min] | H <sub>2</sub> O+0.5%TFA [%] | MeCN [%] | λ [nm] | R <sub>t</sub> [min] |
|------------|------------------------------|----------|--------|----------------------|
| Initial    | 99                           | 1        | 361    | 10.88                |
| 15         | 30                           | 70       |        |                      |

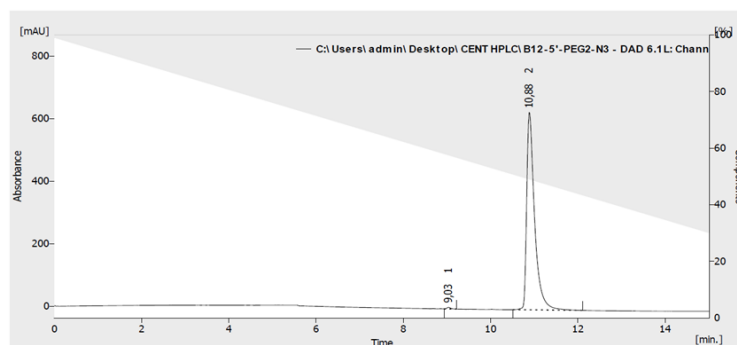

Result Table (Uncal - C:\Users\admin\Desktop\CENT HPLC\B12-5'-PEG2-N3 - DAD 6.1L: Channel 2)

|       | Reten. Time [min] | Area [mAU.s] | Height [mAU] | Area [%] | Height [%] | W05 [min] | PIA Peak Purity |
|-------|-------------------|--------------|--------------|----------|------------|-----------|-----------------|
| 1     | 9,033             | 31,715       | 5,208        | 0,4      | 0,8        | 0,12      | 779             |
| 2     | 10,883            | 7950,937     | 631,293      | 99,6     | 99,2       | 0,18      | 573             |
| Total |                   | 7982,652     | 636,501      | 100,0    | 100,0      |           |                 |

## 2.5 Cbi-3xPEG-N<sub>3</sub>

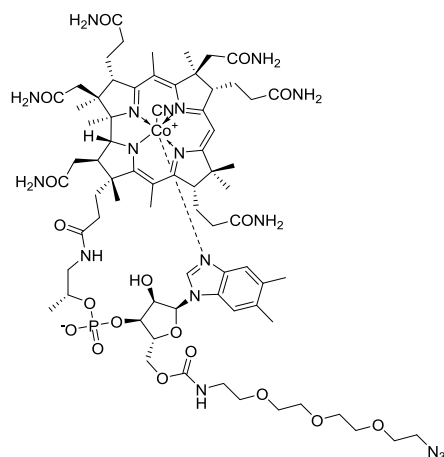

Compound was synthesized according to the procedure described in *J. Porphyrins Phthalocyanines*, **17**, 110-117 (2012). All spectra matched that those reported in the literature.

## 2.6 Cbi-5xPEG-N<sub>3</sub>

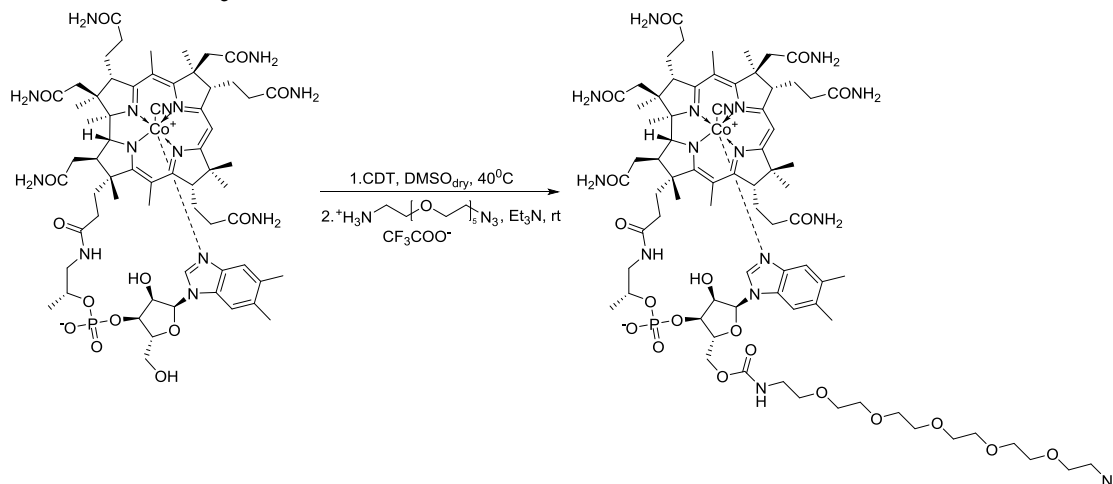

**Cbi-5xPEG-N<sub>3</sub>**: Cobalamin (0.146 mmol, 200 mg) was dissolved in dry DMSO (5 mL) at 40 °C under an argon atmosphere. To a stirring solution under argon solid CDT (100 mg, 0.609 mmol) was added. When full consumption of the substrate (monitored by the RP HPLC) was observed (approx. 1.5 h), heating bath was removed and 2-[2-[2-[2-[2-(2-azidoethoxy)ethoxy]ethoxy]ethoxy]ethoxy]ethoxy)-ethanamine in the form of TFA salt (100 mg) was added in one portion. Subsequently TEA (80 µL) was added and the resulting solution was stirred overnight. Then the reaction mixture was poured into AcOEt (50 mL) and centrifuged. The precipitate was then washed twice with Et<sub>2</sub>O (2 x 15 mL). After drying it was dissolved in water and purified by RP column chromatography (80 mL) with a mixture of MeCN and H<sub>2</sub>O as eluents (gradually from 10 to 15% v/v). The desired compound was obtained as a red powder; yield: 43% (0.063 mmol, 106 mg). <sup>1</sup>H NMR (500 MHz, CD<sub>3</sub>OD) δ 7.24 (s, 1H), 7.14 (s, 1H), 6.57 (s, 1H), 6.22 (d, *J* = 2.6 Hz, 1H), 6.03 (s, 1H), 4.92 (m, 1H), 4.65 (d, *J* = 10.5 Hz, 1H), 4.49 (d, *J* = 8.8 Hz, 1H), 4.41 – 4.30 (m, 1H), 4.26 – 4.08 (m, 4H), 3.67 – 3.56 (m, 23H), 3.52 (t, *J* = 5.4, 2H), 3.37 – 3.32 (m, 2H), 3.27 (m, 1H), 2.95 – 2.81 (m, 2H), 2.70 – 2.31 (m, 8H), 2.58 (s, 3H), 2.57 (s, 3H), 2.28 (s, 3H), 2.27 (s, 3H), 2.22 – 1.93 (m, 6H), 1.92 – 1.80 (m, 3H), 1.88 (s, 3H), 1.80 – 1.57 (m, 1H), 1.46 (s, 3H), 1.38 (s, 3H), 1.36 (s, 3H), 1.31 – 1.20 (m, 2H), 1.24 (d, *J* = 6.3 Hz, 3H), 1.18 (s, 3H), 1.14 – 1.05 (m, 1H), 0.46 (s, 3H). <sup>13</sup>C NMR (126

MHz, CD<sub>3</sub>OD)  $\delta$  181.6, 180.2, 177.6, 177.426, 177.4, 176.6, 176.4, 175.6, 175.5, 175.3, 174.6, 167.2, 166.9, 143.4, 138.3, 135.7, 134.0, 131.4, 117.9, 112.5, 108.8, 105.3, 95.7, 88.3, 86.4, 76.4, 73.4, 71.6, 71.6, 71.6, 71.3, 71.1, 71.0, 70.6, 60.3, 57.7, 57.0, 55.1, 52.6, 51.8, 49.6, 48.4, 46.6, 44.0, 43.0, 41.8, 40.1, 36.2, 35.1, 33.3, 33.0, 32.6, 32.4, 32.3, 29.5, 27.4, 27.4, 20.3, 20.6, 20.5, 20.3, 20.2, 20.0, 17.5, 17.1, 16.4, 16.2. UV/vis (H<sub>2</sub>O)  $\lambda_{\max}$  (nm) ( $\epsilon$ , L mol<sup>-1</sup> cm<sup>-1</sup>) 549 ( $5.8 \times 10^3$ ), 520 ( $5.2 \times 10^4$ ), 361 ( $1.8 \times 10^4$ ), 277 ( $1.1 \times 10^4$ ), 220 ( $3.3 \times 10^4$ ). HRMS (ESI)  $m/z$  [M + Na]<sup>+</sup> calcd for C<sub>76</sub>H<sub>112</sub>N<sub>18</sub>O<sub>20</sub>PCoNa 1709.7268, found 1709.7219. Anal. calcd for C<sub>76</sub>H<sub>112</sub>N<sub>18</sub>O<sub>20</sub>PCo · 7H<sub>2</sub>O: C, 50.33; H, 7.00; N, 13.90. Found: C, 50.22; H, 6.76; N, 14.22.

### HPLC Method:

| Time [min] | H <sub>2</sub> O+0.5%TFA [%] | MeCN [%] | $\lambda$ [nm] | R <sub>t</sub> [min] |
|------------|------------------------------|----------|----------------|----------------------|
| Initial    | 99                           | 1        | 361            | 11.07                |
| 15         | 30                           | 70       |                |                      |

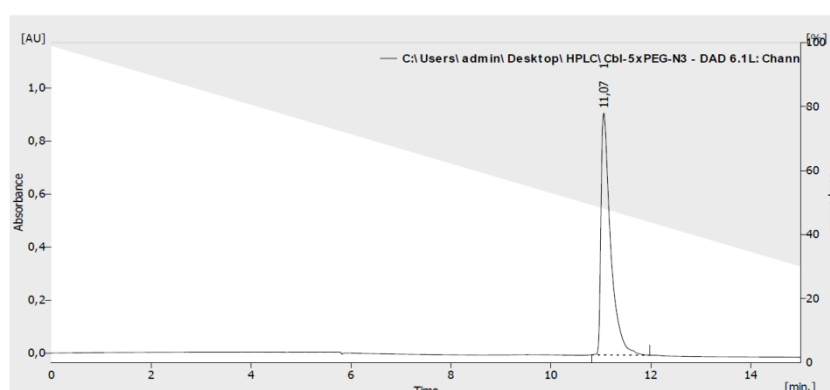

Result Table (Uncal - C:\Users\admin\Desktop\HPLC\Cbl-5xPEG-N3 - DAD 6.1L: Channel 2)

| Reten. Time [min] | Area [mAU.s] | Height [mAU] | Area [%] | Height [%] | W05 [min] | PDA Peak Purity |
|-------------------|--------------|--------------|----------|------------|-----------|-----------------|
| 11,067            | 12246,454    | 911,440      | 100,0    | 100,0      | 0,20      | 616             |
| Total             | 12246,454    | 911,440      | 100,0    | 100,0      |           |                 |

## 3. Synthesis of Cbl conjugates with various dyes

### 3.1 Cbl-FAM

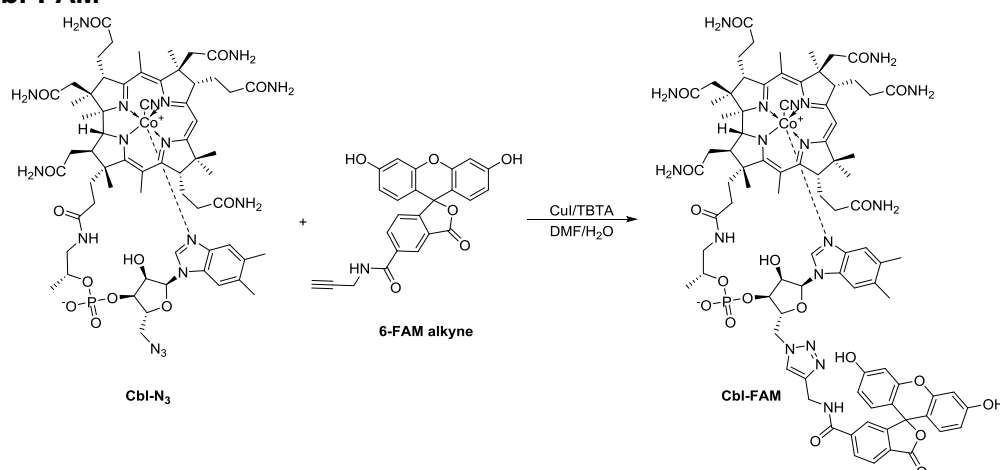

**Cbl-FAM:** CuI (1 mg, 5  $\mu$ mol) and TBTA (5 mg, 10  $\mu$ mol) were dissolved in DMF/H<sub>2</sub>O (1 mL, 3:1 v/v) and stirred for 20 min. Subsequently Cbl-N<sub>3</sub> (24 mg, 17.4  $\mu$ mol) and 6-FAM alkyne (6 mg, 14.5  $\mu$ mol) were added and the reaction mixture was stirred overnight. Then it was diluted with DMF (1 mL), poured into AcOEt (15 mL) and the precipitate was centrifuged and dried. The crude solid was dissolved in MeOH (1 mL), precipitated with Et<sub>2</sub>O (15 mL), and then

centrifuged. The dried solid was then dissolved in H<sub>2</sub>O, loaded onto RP column (30 mL) and purified gradually with MeCN/H<sub>2</sub>O from 10 to 20% v/v yielding orange solid. <sup>1</sup>H NMR (500 MHz, CD<sub>3</sub>OD) δ 8.21 (s, 1H), 8.20 (s, 1H), 8.11 (d, *J* = 7.6 Hz, 1H), 7.74 (s, 1H), 7.14 (s, 1H), 7.10 (s, 1H), 6.75 (bs, 2H), 6.71 – 6.64 (m, 2H), 6.59 (m, 2H), 6.56 (s, 1H), 6.03 (s, 1H), 5.95 (d, *J* = 2.3, 1H), 4.98 (d, *J* = 13.0 Hz, 1H), 4.62 (bs, 2H), 4.53 (bs, 1H), 4.49 (d, *J* = 8.6 Hz, 1H), 4.41 – 4.35 (m, 1H), 4.31 (bs, 1H), 4.13 (d, *J* = 11.4 Hz, 1H), 4.06 (m, 1H), 3.63 (dd, *J* = 5.1, 10.7 Hz, 1H), 3.57 (d, *J* = 13.8 Hz, 1H), 3.21 (d, *J* = 10.1 Hz, 1H), 2.88 – 2.81 (m, 1H), 2.78 (dd, *J* = 9.2, 13.7 Hz, 1H), 2.68 – 2.43 (m, 8H), 2.58 (s, 3H), 2.55 (s, 3H), 2.41 – 2.31 (m, 2H), 2.27 (s, 3H), 2.21 (s, 3H), 2.14 – 1.95 (m, 6H), 1.95 – 1.83 (m, 2H), 1.89 (s, 3H), 1.82 – 1.65 (m, 2H), 1.42 (s, 3H), 1.38 (s, 3H), 1.35 (s, 3H), 1.30 – 1.20 (m, 2H), 1.23 (d, *J* = 5.7 Hz, 3H), 1.20 – 1.07 (m, 1H), 1.18 (s, 3H), 0.42 (s, 3H). <sup>13</sup>C NMR (126 MHz, CD<sub>3</sub>OD) δ 181.6, 180.1, 177.6, 177.35, 177.2, 176.5, 175.6, 175.5, 175.3, 174.6, 174.2, 167.2, 166.9, 143.2, 138.2, 135.8, 134.0, 131.3, 130.6, 117.9, 114.5, 112.4, 108.8, 105.1, 103.6, 95.7, 87.9, 86.4, 81.2, 76.3, 75.8, 70.4, 60.3, 57.7, 57.0, 55.4, 52.6, 43.9, 43.1, 40.1, 36.2, 35.4, 33.5, 33.1, 32.9, 32.4, 32.3, 29.3, 27.4, 20.9, 20.5, 20.30, 20.26, 20.2, 19.9, 17.5, 17.1, 16.4, 16.2. HRMS (ESI) *m/z* [M + 2Na]<sup>2+</sup> calcd for C<sub>87</sub>H<sub>102</sub>CoN<sub>18</sub>O<sub>19</sub>PNa<sub>2</sub>, 919.3211; found, 919.3182.

### HPLC Method:

| Time [min] | H <sub>2</sub> O+0.5%TFA [%] | MeCN [%] | λ [nm] | R <sub>t</sub> [min] |
|------------|------------------------------|----------|--------|----------------------|
| Initial    | 99                           | 1        | 361    | 12.08                |
| 20         | 15                           | 85       |        |                      |
| 40         | 15                           | 85       |        |                      |

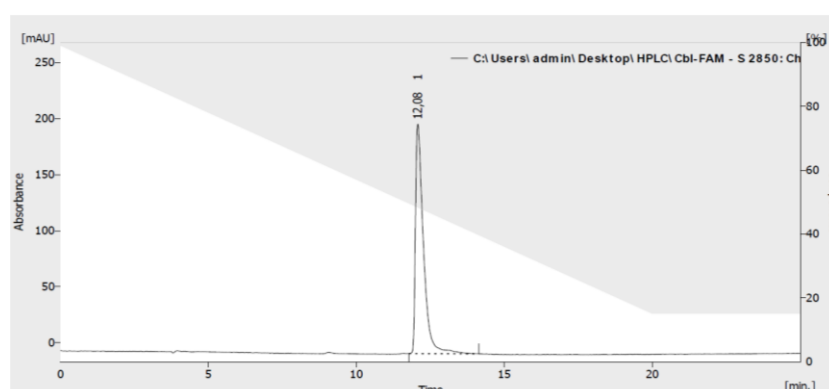

Result Table (Uncal - C:\Users\admin\Desktop\HPLC\Cbl-FAM - S 2850: Ch 2)

| Reten. Time [min] | Area [mAU.s] | Height [mAU] | Area [%] | Height [%] | W05 [min] | PDA Peak Purity |
|-------------------|--------------|--------------|----------|------------|-----------|-----------------|
| 12.083            | 3867,965     | 204,936      | 100,0    | 100,0      | 0,28      | 913             |
| Total             | 3867,965     | 204,936      | 100,0    | 100,0      |           |                 |

### 3.2 Cbl-C6-FAM

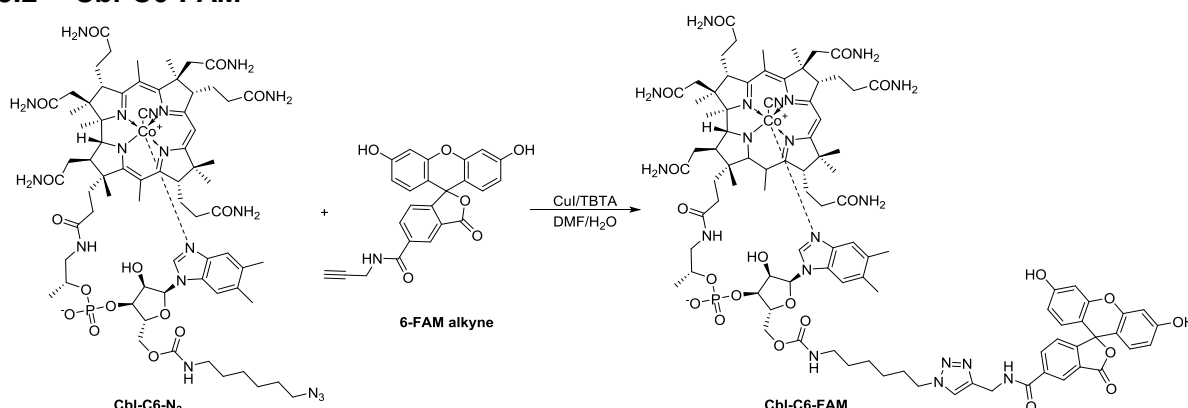

**Cbl-C6-FAM:** Cul (1 mg, 5  $\mu$ mol) and TBTA (5 mg, 10  $\mu$ mol) were dissolved in DMF/H<sub>2</sub>O (1 mL, 3:1 v/v) and stirred for 20 min. Subsequently Cbl-C6-N<sub>3</sub> (27 mg, 17.7  $\mu$ mol) and 6-FAM alkyne (6 mg, 14.5  $\mu$ mol) were added and the reaction mixture was stirred overnight. Then it was diluted with DMF (1 mL), poured into AcOEt (15 mL) and the precipitate was centrifuged and dried. The crude solid was dissolved in MeOH (1 mL), precipitated with Et<sub>2</sub>O (15 mL) and then centrifuged. The dried solid was then dissolved in H<sub>2</sub>O (small amount of MeOH was added for better dissolution), loaded onto RP column (30 mL) and purified gradually with MeCN/H<sub>2</sub>O from 15 to 30% v/v yielding orange solid. <sup>1</sup>H NMR (500 MHz, CD<sub>3</sub>OD)  $\delta$  8.13 (s, 2H), 7.88 (s, 1H), 7.68 (s, 1H), 7.18 (s, 1H), 7.13 (s, 1H), 6.79 (bs, 2H), 6.68 (s, 2H), 6.61 – 6.49 (m, 3H), 6.18 (bs, 1H), 6.03 (s, 1H), 4.92 (m, 1H), 4.66 – 4.47 (m, 6H), 4.42 – 4.28 (m, 1H), 4.33 (t, *J* = 6.8 Hz, 2H), 4.20 (bs, 2H), 4.16 – 4.07 (m, 2H), 3.67 – 3.57 (m, 2H), 3.29 (m, 1H), 3.06 – 2.92 (m, 2H), 2.94 – 2.82 (m, 2H), 2.68 – 2.42 (m, 8H), 2.58 (s, 6H), 2.41 – 2.31 (m, 2H), 2.28 (s, 3H), 2.23 (s, 3H), 2.20 – 1.78 (m, 8H), 1.88 (s, 3H), 1.77 – 1.68 (m, 1H), 1.48 – 1.40 (m, 2H), 1.44 (s, 3H), 1.38 (s, 3H), 1.36 (s, 3H), 1.33 – 1.20 (m, 8H), 1.24 (d, *J* = 6.1 Hz, 3H), 1.18 (s, 3H), 1.16 – 1.07 (m, 1H), 0.46 (s, 3H). <sup>13</sup>C NMR (126 MHz, CD<sub>3</sub>OD)  $\delta$  181.6, 180.1, 177.6, 177.5, 177.4, 176.7, 175.5, 175.3, 174.6, 174.1, 168.3, 167.2, 166.9, 143.3, 140.1, 138.2, 136.8, 135.6, 133.9, 131.3, 131.2, 131.1, 130.1, 117.9, 112.4, 108.7, 105.2, 103.8, 95.6, 88.2, 86.4, 81.4, 76.4, 75.2, 73.5, 70.5, 64.2, 60.3, 57.7, 56.9, 55.0, 52.6, 51.3, 49.9, 46.6, 43.9, 43.0, 41.6, 40.1, 36.3, 36.2, 35.2, 33.3, 33.1, 32.7, 32.4, 32.3, 31.0, 30.8, 30.6, 29.5, 27.4, 27.0, 20.9, 20.5, 20.4, 20.2, 19.9, 17.5, 17.1, 16.4, 16.2. HRMS (ESI) *m/z* [M + Na]<sup>+</sup> calcd for C<sub>94</sub>H<sub>116</sub>CoN<sub>19</sub>O<sub>21</sub>P, 1959.7560; found, 1959.7555.

#### HPLC Method:

| Time [min] | H <sub>2</sub> O+0.5%TFA [%] | MeCN [%] | $\lambda$ [nm] | R <sub>t</sub> [min] |
|------------|------------------------------|----------|----------------|----------------------|
| Initial    | 90                           | 10       | 361            | 9.55                 |
| 15         | 30                           | 70       |                |                      |

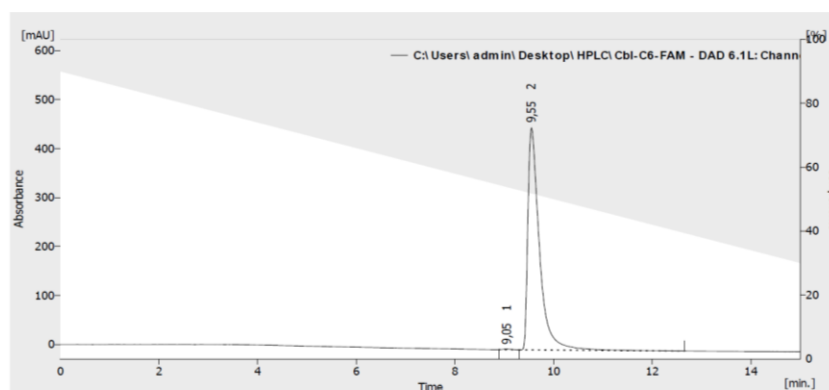

Result Table (Uncal - C:\Users\admin\Desktop\HPLC\Cbl-C6-FAM - DAD 6.1L: Channel 2)

|   | Reten. Time [min] | Area [mAU.s] | Height [mAU] | Area [%] | Height [%] | W05 [min] | PDA Peak Purity |
|---|-------------------|--------------|--------------|----------|------------|-----------|-----------------|
| 1 | 9,050             | 14,792       | 1,208        | 0,2      | 0,3        | 0,22      | 999             |
| 2 | 9,550             | 7407,348     | 453,759      | 99,8     | 99,7       | 0,25      | 460             |
|   | Total             | 7422,140     | 454,967      | 100,0    | 100,0      |           |                 |



### 3.3 Cbl-1xPEG-FAM

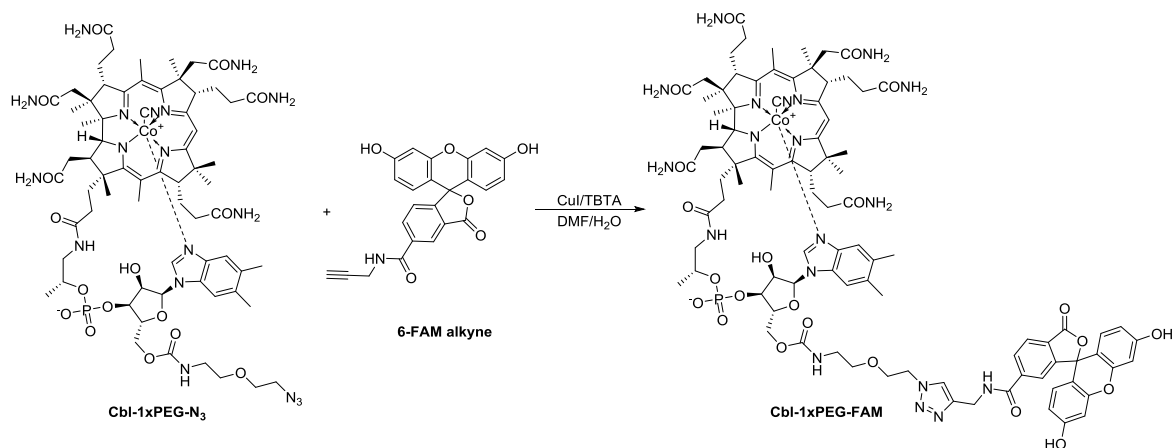

**Cbl-1xPEG-FAM:** : CuI (1 mg, 5  $\mu$ mol) and TBTA (5 mg, 10  $\mu$ mol) were dissolved in DMF/H<sub>2</sub>O (1 mL, 3:1 v/v) and stirred for 20 min. Subsequently Cbl-1xPEG-N<sub>3</sub> (27 mg, 17.9  $\mu$ mol) and 6-FAM alkyne (6 mg, 14.5  $\mu$ mol) were added and the reaction mixture was stirred overnight. Then it was diluted with DMF (1 mL), poured into AcOEt (15 mL) and the precipitate was centrifuged and dried. The crude solid was dissolved in MeOH (1 mL), precipitated with Et<sub>2</sub>O (15 mL) and then centrifuged. The dried solid was then dissolved in H<sub>2</sub>O, loaded onto RP column (30 mL) and purified gradually with MeCN/H<sub>2</sub>O from 10 to 20% v/v yielding orange solid. <sup>1</sup>H NMR (500 MHz, CD<sub>3</sub>OD)  $\delta$  8.22 (bs, 1H), 8.19 – 8.13 (m, 2H), 7.76 (bs, 1H), 7.11 (s, 1H), 7.13 (s, 1H), 6.87 (d,  $J$  = 4.0 Hz, 2H), 6.84 – 6.77 (m, 2H), 6.72 (s, 1H), 6.70 (s, 1H), 6.57 (s, 1H), 6.28 (bs, 1H), 6.02 (s, 1H), 4.98 (bs, 1H), 4.60 (bs, 1H), 4.55 – 4.44 (m, 3H), 4.40 (bs, 1H), 4.28 (bs, 1H), 4.22 (bs, 1H), 4.14 (d,  $J$  = 11.2 Hz, 1H), 4.05 (bs, 1H), 3.78 (bs, 2H), 3.71 – 3.58 (m, 2H), 3.46 – 3.36 (m, 2H), 3.27 (d,  $J$  = 10.7 Hz, 1H), 3.13 – 3.02 (m, 2H), 2.92 – 2.82 (m, 2H), 2.72 – 2.44 (m, 10H), 2.58 (s, 6H), 2.43 – 2.32 (m, 3H), 2.27 (s, 3H), 2.19 (s, 3H), 2.15-1.67 (m, 8H), 1.89 (s, 3H), 1.40 (s, 3H), 1.38 (s, 3H), 1.37 (s, 3H), 1.33 – 1.22 (m, 2H), 1.25 (bs, 3H), 1.17 (s, 3H), 1.20 – 1.08 (m, 1H), 0.45 (s, 3H). <sup>13</sup>C NMR (126 MHz, CD<sub>3</sub>OD)  $\delta$  181.6, 180.1, 177.6, 177.4, 176.7, 175.6, 175.5, 175.4, 174.6, 174.3, 167.2, 166.9, 158.3, 143.3, 138.3, 135.7, 134.0, 131.3, 131.2, 130.7, 117.9, 115.7, 112.5, 108.7, 105.2, 103.7, 95.6, 88.3, 86.4, 81.3, 76.3, 75.4, 74.7, 70.7, 70.6, 69.9, 64.1, 60.3, 57.7, 57.0, 55.2, 52.5, 46.6, 43.0, 41.6, 40.1, 36.2, 33.5, 33.3, 33.0, 32.3, 29.5, 27.5, 27.4, 20.9, 20.53, 20.45, 20.3, 20.1, 19.9, 17.5, 17.1, 16.4, 16.1. HRMS (ESI)  $m/z$  [M + H + Na]<sup>2+</sup> calcd for C<sub>92</sub>H<sub>112</sub>CoN<sub>19</sub>O<sub>22</sub>PNa, 973.8593; found, 973.8585.

#### HPLC Method:

| Time [min] | H <sub>2</sub> O+0.5%TFA [%] | MeCN [%] | $\lambda$ [nm] | R <sub>t</sub> [min] |
|------------|------------------------------|----------|----------------|----------------------|
| Initial    | 99                           | 1        | 361            | 11.78                |
| 15         | 30                           | 70       |                |                      |

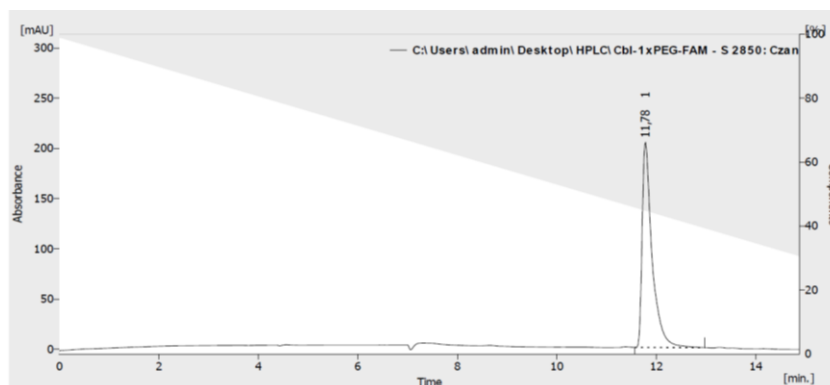

Result Table (Uncal - C:\Users\admin\Desktop\HPLC\Cbl-1xPEG-FAM - S 2850: Czan 1)

|   | Reten. Time [min] | Area [mAU.s] | Height [mAU] | Area [%] | Height [%] | W05 [min] | PDA Peak Purity |
|---|-------------------|--------------|--------------|----------|------------|-----------|-----------------|
| 1 | 11,783            | 2832,624     | 204,294      | 100,0    | 100,0      | 0,20      | 664             |
|   | Total             | 2832,624     | 204,294      | 100,0    | 100,0      |           |                 |

### 3.4 Cbl-2xPEG-FAM

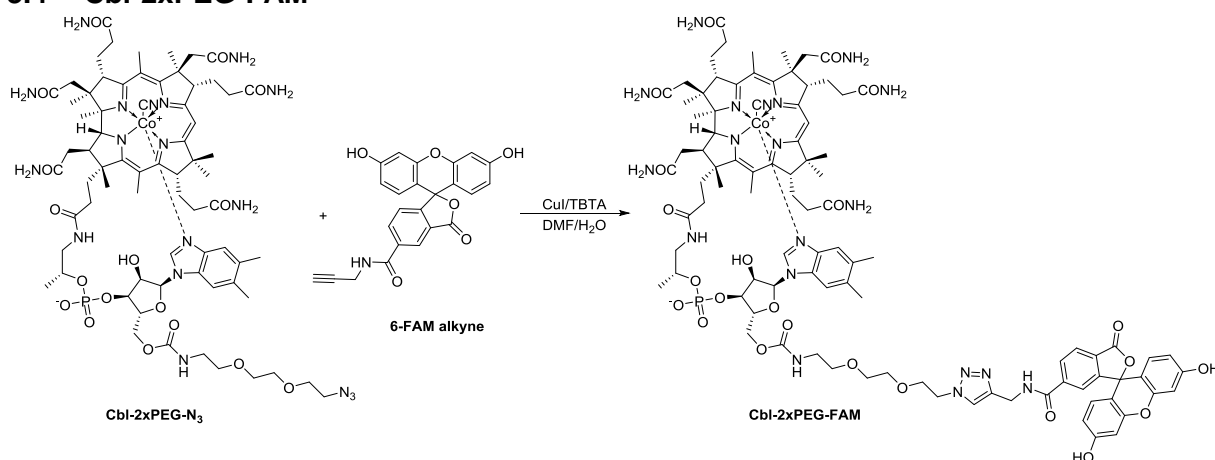

**Cbl-2xPEG-FAM:** CuI (1 mg, 5  $\mu\text{mol}$ ) and TBTA (5 mg, 10  $\mu\text{mol}$ ) were dissolved in DMF/H<sub>2</sub>O (1 mL, 3:1 v/v) and stirred for 20 min. Subsequently Cbl-2xPEG-N<sub>3</sub> (27 mg, 17.4  $\mu\text{mol}$ ) and 6-FAM alkyne (6 mg, 14.5  $\mu\text{mol}$ ) were added and the reaction mixture was stirred overnight. Then it was diluted with DMF (1 mL), poured into AcOEt (15 mL) and the precipitate was centrifuged and dried. The crude solid was dissolved in MeOH (1 mL), precipitated with Et<sub>2</sub>O (15 mL), and then centrifuged. The dried solid was then dissolved in H<sub>2</sub>O, loaded onto RP column (30 mL) and purified gradually with MeCN/H<sub>2</sub>O from 10 to 20% v/v yielding orange solid. <sup>1</sup>H NMR (500 MHz, CD<sub>3</sub>OD)  $\delta$  8.20 (bs, 1H), 8.19 – 8.12 (m, 2H), 7.72 (bs, 1H), 7.18 (s, 1H), 7.13 (s, 1H), 6.84 (s, 2H), 6.82 – 6.76 (m, 2H), 6.71 – 6.64 (m, 2H), 6.56 (s, 1H), 6.24 (bs, 1H), 6.02 (s, 1H), 4.93 (bs, 1H), 4.68 – 4.55 (m, 2H), 4.55 – 4.44 (m, 3H), 4.41 (bs, 1H), 4.23 (bs, 2H), 4.13 (d,  $J$  = 11.1 Hz, 2H), 3.82 (s, 2H), 3.71 – 3.57 (m, 2H), 3.50 (bs, 2H), 3.43 (bs, 2H), 3.34 – 3.29 (m, 4H), 3.27 (d,  $J$  = 10.7, 1H), 3.10 (bs, 2H), 2.93 – 2.78 (m, 2H), 2.69 – 2.44 (m, 9H), 2.58 (s, 6H), 2.42 – 2.31 (m, 3H), 2.27 (s, 3H), 2.21 (s, 3H), 2.16 – 1.70 (m, 6H), 1.89 (s, 3H), 1.41 (s, 3H), 1.38 (s, 3H), 1.36 (s, 3H), 1.33 – 1.21 (m, 2H), 1.26 (bs, 3H), 1.17 (s, 3H), 1.19 – 1.06 (m, 1H), 0.45 (s, 3H). <sup>13</sup>C NMR (126 MHz, CD<sub>3</sub>OD) 181.6, 180.1, 177.6, 177.4, 176.7, 175.6, 175.5, 175.4, 174.6, 174.3, 169.8, 167.2, 166.9, 143.3, 138.3, 135.7, 134.1, 131.3, 131.1, 130.6, 117.9, 115.3, 112.4, 112.2, 108.7, 105.2, 103.6, 95.6, 88.3, 86.4, 81.3, 76.3, 75.4, 74.6, 71.3, 71.2, 70.8, 70.5, 70.2, 64.1, 60.3, 57.7, 57.0, 55.2, 52.5, 51.7, 46.6, 44.0, 43.0, 41.8, 40.1, 36.2, 33.5, 33.2, 33.0, 32.3, 29.5, 27.5, 27.4, 20.9, 20.53, 20.45, 20.3, 20.0, 19.9, 17.5, 17.0, 16.4, 16.1. HRMS (ESI)  $m/z$  [ $M + 2Na$ ]<sup>2+</sup> calcd for C<sub>94</sub>H<sub>115</sub>CoN<sub>19</sub>O<sub>23</sub>PNa<sub>2</sub>, 1006.8634; found, 1006.8627.

## HPLC Method:

| Time [min] | H <sub>2</sub> O+0.5%TFA [%] | MeCN [%] | λ [nm] | R <sub>t</sub> [min] |
|------------|------------------------------|----------|--------|----------------------|
| Initial    | 99                           | 1        | 361    | 11.87                |
| 15         | 30                           | 70       |        |                      |

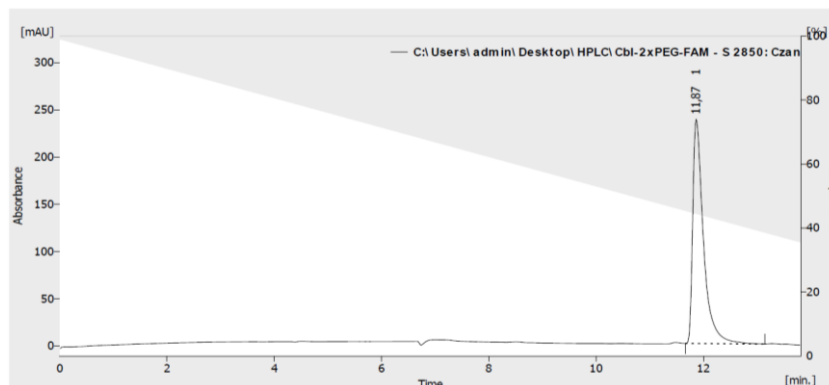

Result Table (Uncal - C:\Users\admin\Desktop\HPLC\Cbl-2xPEG-FAM - S 2850- Czanel 1)

| Reten. Time [min] | Area [mAU.s] | Height [mAU] | Area [%] | Height [%] | W05 [min] | PDA Peak Purity |     |
|-------------------|--------------|--------------|----------|------------|-----------|-----------------|-----|
| 1                 | 11,867       | 3308,287     | 237,538  | 100,0      | 100,0     | 0,22            | 951 |
| Total             |              | 3308,287     | 237,538  | 100,0      | 100,0     |                 |     |

## 3.5 Cbl-3xPEG-FAM

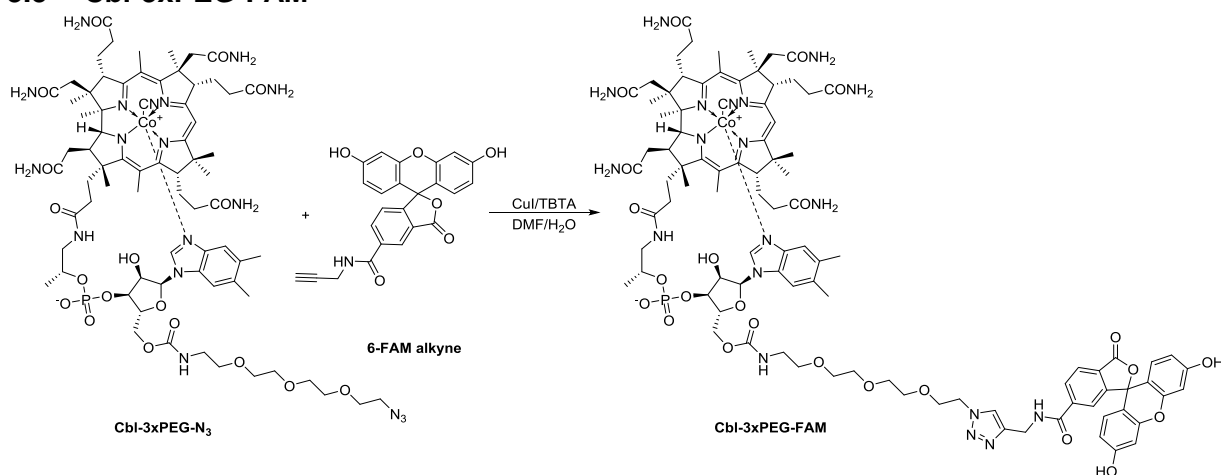

**Cbl-3xPEG-FAM:** CuI (1 mg, 5 μmol) and TBTA (5 mg, 10 μmol) were dissolved in DMF/H<sub>2</sub>O (1 mL, 3:1 v/v) and stirred for 20 min. Subsequently Cbl-3xPEG-N<sub>3</sub> (28 mg, 17.5 μmol) and 6-FAM alkyne (6 mg, 14.5 μmol) were added and the reaction mixture was stirred overnight. Then it was diluted with DMF (1 mL), poured into AcOEt (15 mL) and the precipitate was centrifuged and dried. The crude solid was dissolved in MeOH (1 mL), precipitated with Et<sub>2</sub>O (15 mL), and then centrifuged. The dried solid was then dissolved in H<sub>2</sub>O, loaded onto RP column (30 mL) and purified gradually with MeCN/H<sub>2</sub>O from 10 to 20% v/v yielding orange solid. <sup>1</sup>H NMR (500 MHz, CD<sub>3</sub>OD) δ 8.25 (bs, 1H), 8.11 (s, 1H), 7.75 (bs, 2H), 7.20(s, 1H), 7.14 (s, 1H), 6.70 (s, 2H), 6.61 (s, 2H), 6.58 – 6.45 (m, 3H), 6.23 (bs, 1H), 6.02 (s, 1H), 4.65 – 4.44 (m, 5H), 4.32 – 4.17 (m, 3H), 4.17 – 4.06 (m, 2H), 3.87 (bs, 2H), 3.70 – 3.65 (m, 2H), 3.65 – 3.58 (m, 2H), 3.52 – 3.36 (m, 12H), 3.28 (m, 1H), 3.25 – 3.14 (m, 2H), 2.95 – 2.82 (m, 2H), 2.71 – 2.41(m, 8H), 2.58 (s, 6H), 2.42 – 2.32 (m, 2H), 2.28 (s, 3H), 2.22 (s, 3H), 2.17 – 1.79 (m, 6H), 1.88 (s, 3H), 1.79 – 1.70 (m, 1H), 1.42(s, 3H), 1.38 (s, 3H), 1.36 (s, 3H), 1.33 – 1.20 (m, 5H), 1.17 (s, 3H), 1.14-1.05 (m, 1H), 0.46 (s, 3H). <sup>13</sup>C NMR (126 MHz, CD<sub>3</sub>OD) δ 181.6, 180.2, 177.6, 177.4, 176.6, 175.2, 175.3, 167.2, 166.9, 154.0, 143.4, 138.3, 135.7, 134.0,

131.4, 130.3, 117.9, 112.5, 110.9, 108.7, 105.2, 103.7, 95.6, 86.4, 76.4, 71.4, 71.37, 71.32, 71.2, 71.1, 70.9, 60.3, 57.7, 56.9, 55.2, 52.5, 51.9, 43.0, 41.8, 40.1, 33.3, 32.3, 29.5, 27.5, 27.4, 20.9, 20.6, 20.6, 20.3, 19.9, 17.5, 17.1, 16.4, 16.1. HRMS (ESI)  $m/z$   $[M + H + Na]^{2+}$  calcd for  $C_{96}H_{120}CoN_{19}O_{24}PNa$ , 1017.8855; found, 1017.8862.

### HPLC Method:

| Time [min] | H <sub>2</sub> O+0.5%TFA [%] | MeCN [%] | $\lambda$ [nm] | R <sub>t</sub> [min] |
|------------|------------------------------|----------|----------------|----------------------|
| Initial    | 99                           | 1        | 361            | 11.98                |
| 15         | 30                           | 70       |                |                      |

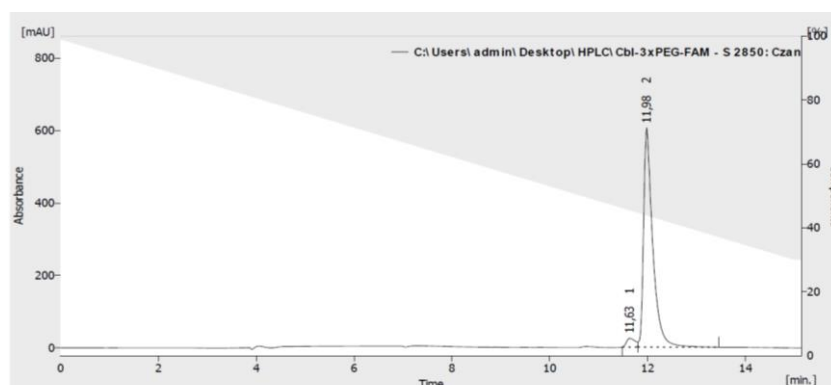

Result Table (Uncal - C:\Users\admin\Desktop\HPLC\Cbl-3xPEG-FAM - S 2850 - Canal 1)

| Reten. Time [min] | Area [mAU.s] | Height [mAU] | Area [%] | Height [%] | W05 [min] | PDA Peak Purity |
|-------------------|--------------|--------------|----------|------------|-----------|-----------------|
| 1                 | 290,747      | 24,181       | 3,6      | 3,8        | 0,25      | 568             |
| 2                 | 7871,066     | 605,778      | 96,4     | 96,2       | 0,20      | 568             |
| Total             | 8161,813     | 629,959      | 100,0    | 100,0      |           |                 |

### 3.6 Cbl-Cy5

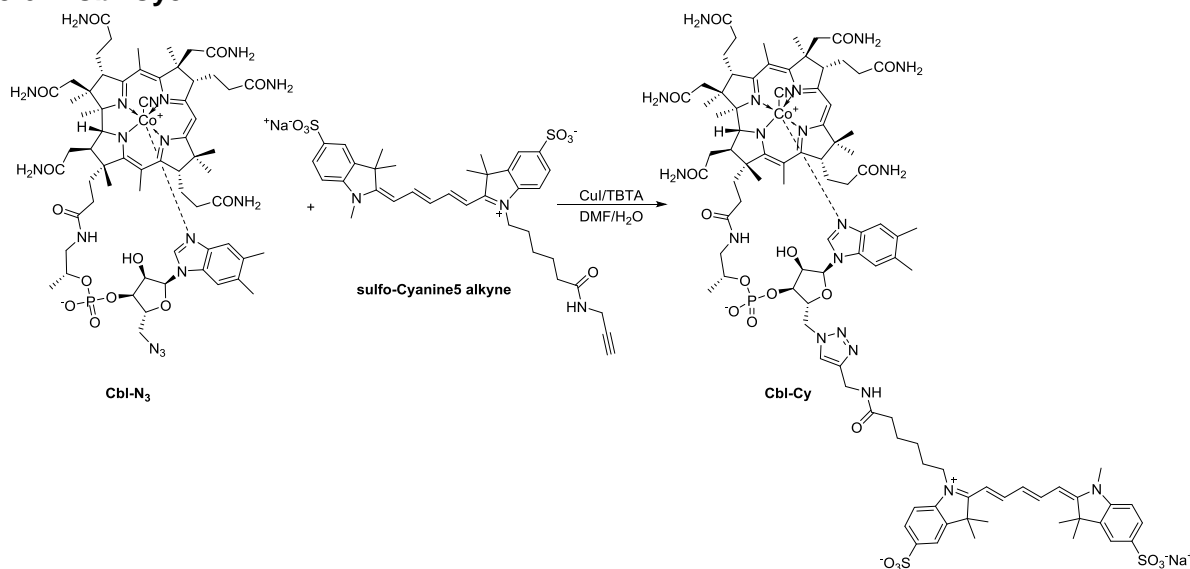

**Cbl-Cy5:** Preparation of a catalyst solution: CuI (1 mg, 5  $\mu$ mol) and TBTA (5 mg, 10  $\mu$ mol) were dissolved in DMF (2 mL) and stirred for 20 min. Cbl-N<sub>3</sub> (3 mg, 2.20  $\mu$ mol) and sulfo-Cyanine5 alkyne (0.5 mg, 0.72  $\mu$ mol) were dissolved in DMF/H<sub>2</sub>O (200  $\mu$ L, 1:1, v/v) and subsequently freshly prepared catalyst solution (300  $\mu$ L) was added and the reaction mixture was stirred overnight. Then it was diluted with DMF (1 mL), poured into AcOEt (10 mL) and the precipitate was centrifuged and dried. The crude solid was dissolved in MeOH (1 mL), precipitated with Et<sub>2</sub>O (10 mL), and then centrifuged. The dried solid was then dissolved in H<sub>2</sub>O, loaded onto RP column (10 mL) and purified gradually with MeCN/H<sub>2</sub>O from 10 to 20%

v/v yielding blue solid. HRMS (ESI)  $m/z$   $[M + 2Na]^{2+}$  calcd for  $C_{98}H_{127}CoN_{20}O_{20}PS_2Na_3$ , 1063.3864; found, 1063.3871.

### HPLC Method:

| Time [min] | H <sub>2</sub> O+0.5%TFA [%] | MeCN [%] | $\lambda$ [nm] | R <sub>t</sub> [min] |
|------------|------------------------------|----------|----------------|----------------------|
| Initial    | 99                           | 1        | 646            | 11.30                |
| 15         | 30                           | 70       |                |                      |

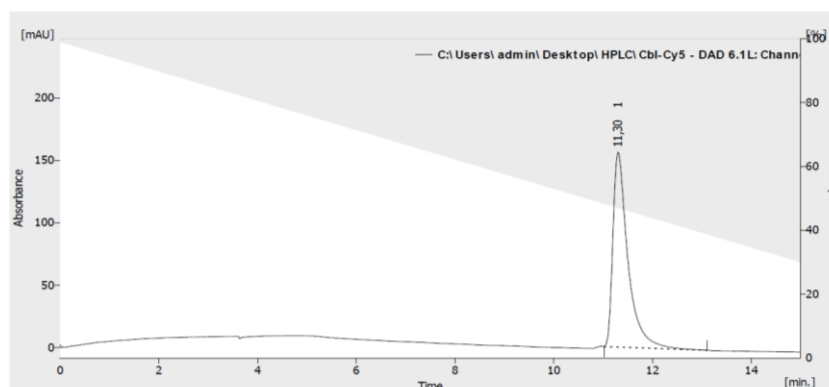

Result Table (Uncal - C:\Users\admin\Desktop\HPLC\Cbl-Cy5 - DAD 6.1L: Channel 3)

| Reten. Time [min] | Area [mAU.s] | Height [mAU] | Area [%] | Height [%] | W05 [min] | PDA Peak Purity |
|-------------------|--------------|--------------|----------|------------|-----------|-----------------|
| 11,300            | 3283,150     | 155,931      | 100,0    | 100,0      | 0,30      | 613             |
| Total             | 3283,150     | 155,931      | 100,0    | 100,0      |           |                 |

### 3.7 Cbl-C6-ATTO 488

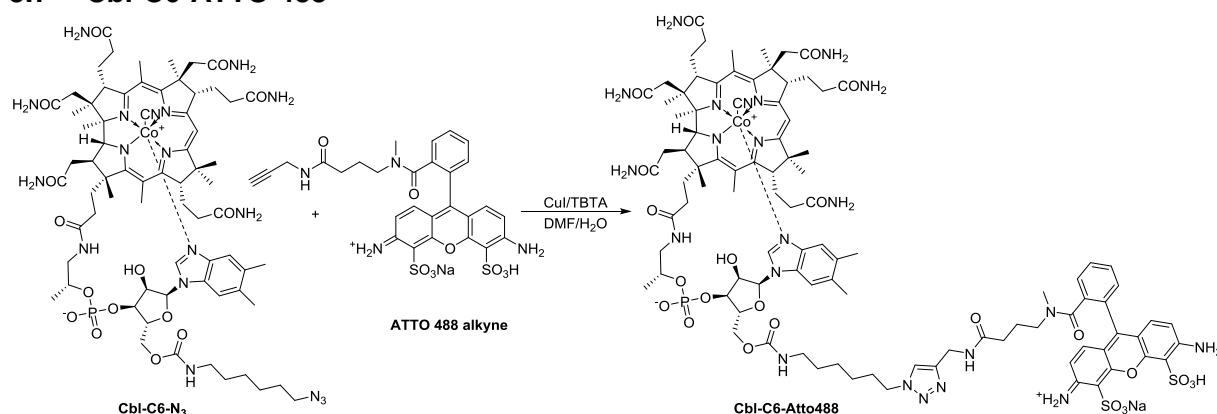

**Cbl-C6-ATTO 488:** Preparation of a catalyst solution: CuI (1 mg, 5  $\mu$ mol) and TBTA (5 mg, 10  $\mu$ mol) were dissolved in DMF (2 mL) and stirred for 20 min. Cbl-C6-N<sub>3</sub> (3 mg, 1.97  $\mu$ mol) and ATTO 488 alkyne (0.5 mg, 0.68  $\mu$ mol) were dissolved in DMF/H<sub>2</sub>O (200  $\mu$ L, 1:1, v/v) and subsequently freshly prepared catalyst solution (300  $\mu$ L) was added and the reaction mixture was stirred overnight. Then it was diluted with DMF (1 mL), poured into AcOEt (10 mL) and the precipitate was centrifuged and dried. The crude solid was dissolved in MeOH (1 mL), precipitated with Et<sub>2</sub>O (10 mL), and then centrifuged. The dried solid was then dissolved in H<sub>2</sub>O, loaded onto RP column (10 mL) and purified gradually with MeCN/H<sub>2</sub>O from 10 to 20% v/v yielding orange solid. HRMS (ESI)  $m/z$   $[M + Na]^{2+}$  calcd for  $C_{98}H_{126}CoN_{22}O_{24}PS_2Na_2^+$ , 1097.3805; found, 1097.3818.

## HPLC Method:

| Time [min] | H <sub>2</sub> O+0.2%TFA [%] | MeCN [%] | λ [nm] | R <sub>t</sub> [min] |
|------------|------------------------------|----------|--------|----------------------|
| Initial    | 99                           | 1        | 488    | 9.07                 |
| 15         | 30                           | 70       |        |                      |
| 20         | 30                           | 70       |        |                      |
| 30         | 5                            | 95       |        |                      |

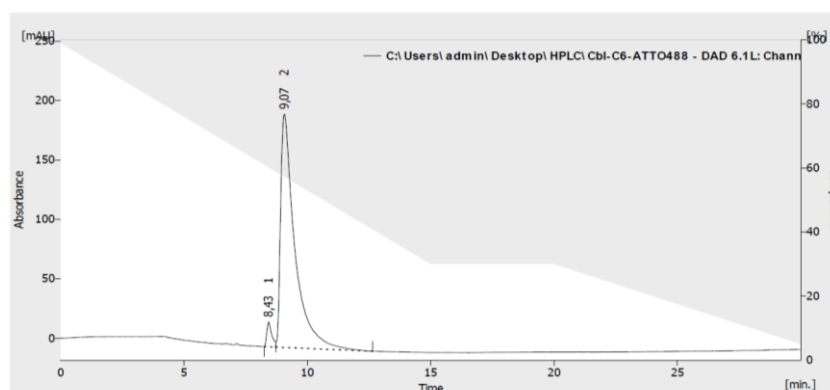

Result Table (Uncal - C:\Users\admin\Desktop\HPLC\Cbl-C6-ATTO488 - DAD 6.1L: Channel 3)

| Reten. Time [min] | Area [mAU.s] | Height [mAU] | Area [%] | Height [%] | W05 [min] | PDA Peak Purity |     |
|-------------------|--------------|--------------|----------|------------|-----------|-----------------|-----|
| 1                 | 8,433        | 287,697      | 20,925   | 3,5        | 9,6       | 0,22            | 729 |
| 2                 | 9,067        | 7857,586     | 196,321  | 96,5       | 90,4      | 0,55            | 480 |
| Total             |              | 8145,283     | 217,246  | 100,0      | 100,0     |                 |     |

## 3.8 Cbl-ATTO 590

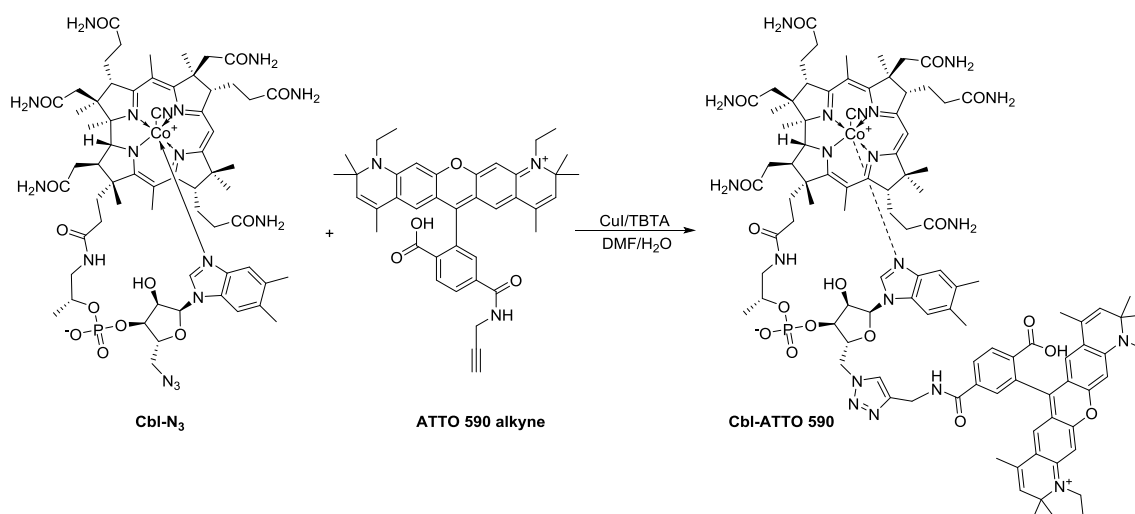

**Cbl-ATTO 590:** Preparation of a catalyst solution: CuI (1 mg, 5 μmol) and TBTA (5 mg, 10 μmol) were dissolved in DMF (2 mL) and stirred for 20 min. Cbl-N<sub>3</sub> (3 mg, 2.20 μmol) and ATTO 590 alkyne (0.5 mg, 0.68 μmol) were dissolved in DMF/H<sub>2</sub>O (200 μL, 1:1, v/v) and subsequently freshly prepared catalyst solution (300 μL) was added and the reaction mixture was stirred overnight. Then it was diluted with DMF (1 mL), poured into AcOEt (10 mL) and the precipitate was centrifuged and dried. The crude solid was dissolved in MeOH (1 mL), precipitated with Et<sub>2</sub>O (10 mL), and then centrifuged. The dried solid was then dissolved in H<sub>2</sub>O, loaded onto RP column (10 mL) and purified gradually with MeCN/H<sub>2</sub>O from 15 to 30% v/v yielding violet solid. HRMS (ESI) m/z [M + H]<sup>2+</sup> calcd for C<sub>103</sub>H<sub>130</sub>CoN<sub>20</sub>O<sub>17</sub>P<sup>+</sup>, 1004.4491; found, 1004.4499.

## HPLC Method:

| Time [min] | H <sub>2</sub> O+0.2%TFA [%] | MeCN [%] | λ [nm] | R <sub>t</sub> [min] |
|------------|------------------------------|----------|--------|----------------------|
| Initial    | 99                           | 1        | 590    | 12.50                |
| 15         | 30                           | 70       |        |                      |
| 20         | 30                           | 70       |        |                      |
| 30         | 5                            | 95       |        |                      |

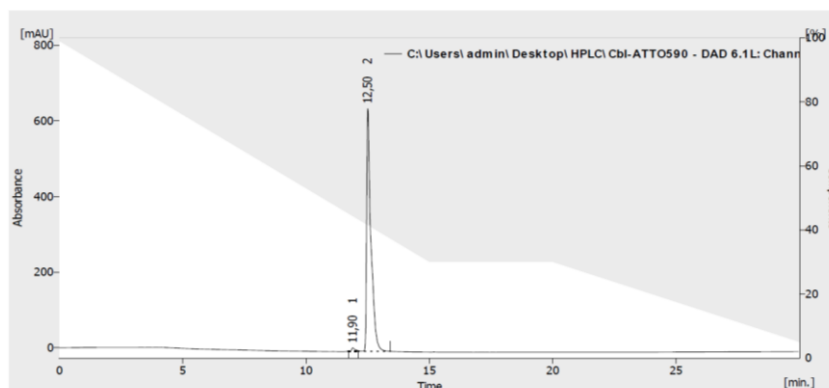

Result Table (Uncal - C:\Users\admin\Desktop\HPLC\Cbl-ATTO590 - DAD 6.1L: Channel 3)

|       | Reten. Time [min] | Area [mAU.s] | Height [mAU] | Area [%] | Height [%] | W05 [min] | PDA Peak Purity |
|-------|-------------------|--------------|--------------|----------|------------|-----------|-----------------|
| 1     | 11,900            | 88,896       | 9,427        | 1,1      | 1,4        | 0,15      | 989             |
| 2     | 12,500            | 7728,290     | 641,767      | 98,9     | 98,6       | 0,17      | 413             |
| Total |                   | 7817,186     | 651,194      | 100,0    | 100,0      |           |                 |

## 3.9 Cbl-C6-ATTO 590

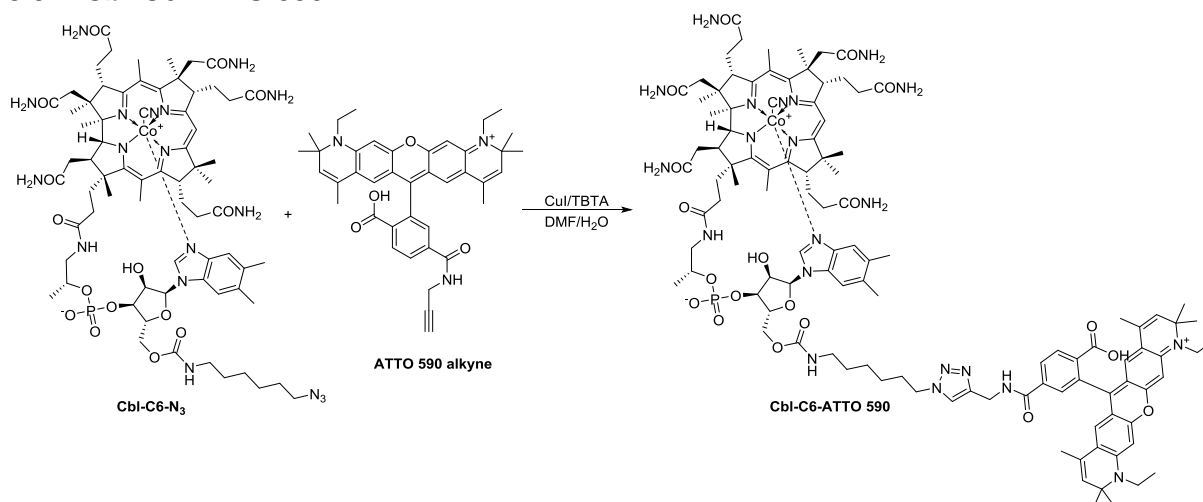

**Cbl-C6-ATTO 590:** Preparation of a catalyst solution: CuI (1 mg, 5 μmol) and TBTA (5 mg, 10 μmol) were dissolved in DMF (2 mL) and stirred for 20 min. Cbl-C6-N<sub>3</sub> (3 mg, 1.97 μmol) and ATTO 590 alkyne (0.5 mg, 0.68 μmol) were dissolved in DMF/H<sub>2</sub>O (200 μL, 1:1, v/v) and subsequently freshly prepared catalyst solution (300 μL) was added and the reaction mixture was stirred overnight. Then it was diluted with DMF (1 mL), poured into AcOEt (10 mL) and the precipitate was centrifuged and dried. The crude solid was dissolved in MeOH (1 mL), precipitated with Et<sub>2</sub>O (10 mL), and then centrifuged. The dried solid was then dissolved in H<sub>2</sub>O, loaded onto RP column (10 mL) and purified gradually with MeCN/H<sub>2</sub>O from 15 to 40%

v/v yielding violet solid. HRMS (ESI)  $m/z$   $[M + H]^{2+}$  calcd for  $C_{110}H_{143}CoN_{21}O_{19}P^+$ , 1075.9964; found, 1075.9967.

### HPLC Method:

| Time [min] | H <sub>2</sub> O+0.2%TFA [%] | MeCN [%] | $\lambda$ [nm] | R <sub>t</sub> [min] |
|------------|------------------------------|----------|----------------|----------------------|
| Initial    | 99                           | 1        | 590            | 13.22                |
| 15         | 30                           | 70       |                |                      |
| 20         | 30                           | 70       |                |                      |
| 30         | 5                            | 95       |                |                      |

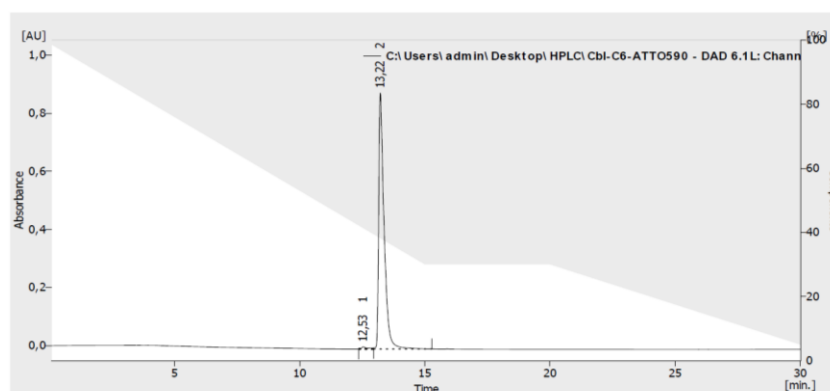

Result Table (Uncal - C:\Users\admin\Desktop\HPLC\Cbl-C6-ATTO590 - DAD 6.1L: Channel 3)

|       | Reten. Time [min] | Area [mAU.s] | Height [mAU] | Area [%] | Height [%] | W05 [min] | PDA Peak Purity |
|-------|-------------------|--------------|--------------|----------|------------|-----------|-----------------|
| 1     | 12,533            | 113,565      | 7,654        | 0,9      | 0,9        | 0,18      | 994             |
| 2     | 13,217            | 13048,298    | 881,392      | 99,1     | 99,1       | 0,22      | 152             |
| Total |                   | 13161,864    | 889,046      | 100,0    | 100,0      |           |                 |

### 3.10 Cbl-5xPEG-ATTO 590

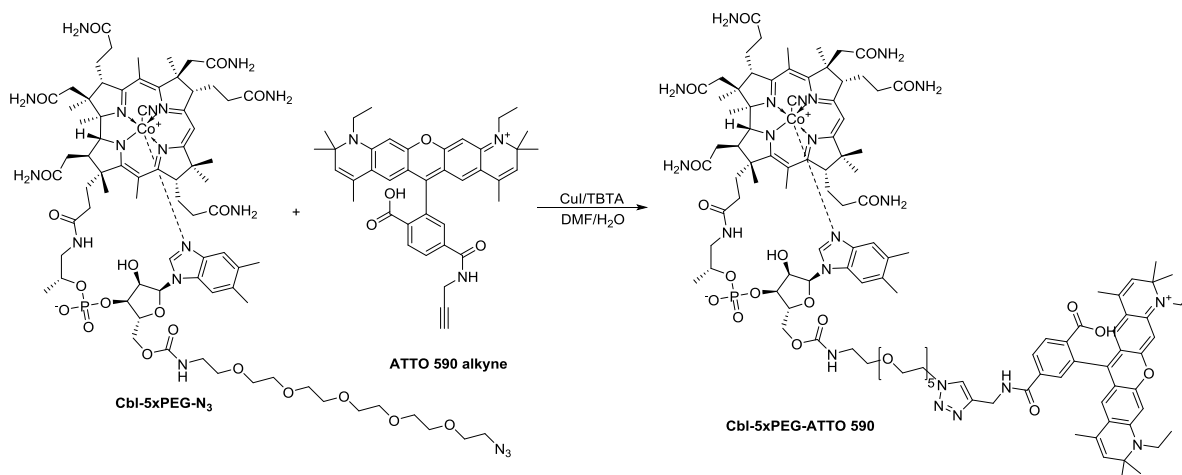

**Cbl-5xPEG-ATTO 590:** Preparation of a catalyst solution: CuI (1 mg, 5  $\mu$ mol) and TBTA (5 mg, 10  $\mu$ mol) were dissolved in DMF (2 mL) and stirred for 20 min. Cbl-5xPEG-N<sub>3</sub> (3 mg, 1.78  $\mu$ mol) and ATTO 590 alkyne (0.5 mg, 0.68  $\mu$ mol) were dissolved in DMF/H<sub>2</sub>O (200  $\mu$ L, 1:1, v/v) and subsequently freshly prepared catalyst solution (300  $\mu$ L) was added and the reaction mixture was stirred overnight. Then it was diluted with DMF (1 mL), poured into AcOEt (10 mL) and the precipitate was centrifuged and dried. The crude solid was dissolved in MeOH (1 mL), precipitated with Et<sub>2</sub>O (10 mL), and then centrifuged. The dried solid was then dissolved in H<sub>2</sub>O, loaded onto RP column (10 mL) and purified gradually with MeCN/H<sub>2</sub>O from 15 to 30% v/v yielding violet solid. HRMS (ESI)  $m/z$   $[M + Na]^{2+}$  calcd for  $C_{116}H_{154}CoN_{21}O_{24}PNa^+$ , 1169.0216; found, 1169.0219.



## HPLC Method:

| Time [min] | H <sub>2</sub> O+0.5%TFA [%] | MeCN [%] | λ [nm] | R <sub>t</sub> [min] |
|------------|------------------------------|----------|--------|----------------------|
| Initial    | 99                           | 1        | 590    | 12.73                |
| 15         | 30                           | 70       |        |                      |
| 20         | 30                           | 70       |        |                      |
| 30         | 5                            | 95       |        |                      |

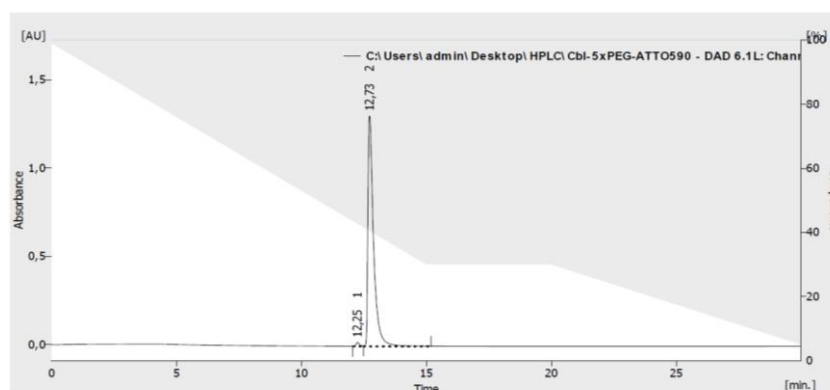

Result Table (Uncal - C:\Users\admin\Desktop\HPLC\Cbl-5xPEG-ATTO590 - DAD 6.1L: Channel 3)

| Reten. Time [min] | Area [mAU.s] | Height [mAU] | Area [%] | Height [%] | W05 [min] | PDA Peak Purity |     |
|-------------------|--------------|--------------|----------|------------|-----------|-----------------|-----|
| 1                 | 12,250       | 207,748      | 23,311   | 1,0        | 1,8       | 0,15            | 899 |
| 2                 | 12,733       | 20468,553    | 1304,040 | 99,0       | 98,2      | 0,23            | 346 |
| Total             |              | 20676,302    | 1327,351 | 100,0      |           |                 |     |

### 3.11 Cbl-ATTO 633

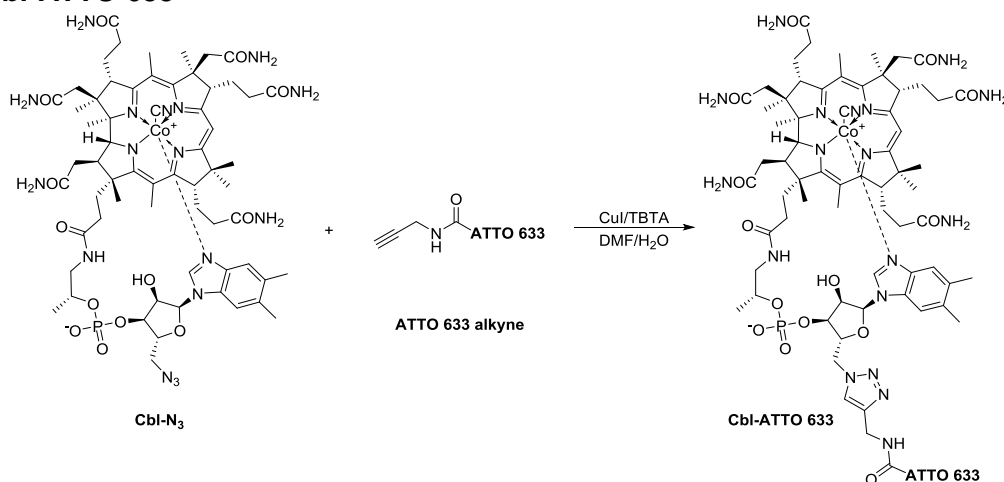

**Cbl-ATTO 633:** Preparation of a catalyst solution: CuI (1 mg, 5 μmol) and TBTA (5 mg, 10 μmol) were dissolved in DMF (2 mL) and stirred for 20 min. Cbl-N<sub>3</sub> (3 mg, 2.20 μmol) and ATTO 633 alkyne (0.5 mg, 0.72 μmol) were dissolved in DMF/H<sub>2</sub>O (200 μL, 1:1, v/v) and subsequently freshly prepared catalyst solution (300 μL) was added and the reaction mixture was stirred overnight. Then it was diluted with DMF (1 mL), poured into AcOEt (10 mL) and the precipitate was centrifuged and dried. The crude solid was dissolved in MeOH (1 mL), precipitated with Et<sub>2</sub>O (10 mL), and then centrifuged. The dried solid was then dissolved in H<sub>2</sub>O, loaded onto RP column (10 mL) and purified by RP column chromatography gradually with MeCN/H<sub>2</sub>O from 15 to 40% v/v yielding blue solid. LRMS (ESI) m/z [M + Na + H]<sup>2+</sup> found, 995.96.

## HPLC Method:

| Time [min] | H <sub>2</sub> O+0.2%TFA [%] | MeCN [%] | λ [nm] | R <sub>t</sub> [min] |
|------------|------------------------------|----------|--------|----------------------|
| Initial    | 99                           | 1        | 633    | 12.63                |
| 15         | 30                           | 70       |        |                      |
| 20         | 30                           | 70       |        |                      |
| 30         | 5                            | 95       |        |                      |

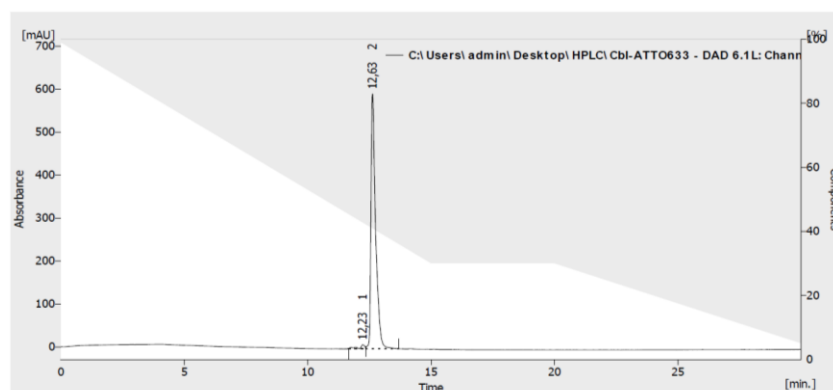

Result Table (Uncal - C:\Users\admin\Desktop\HPLC\Cbl-ATTO633 - DAD 6.1L: Channel 3)

| Reten. Time [min] | Area [mAU.s] | Height [mAU] | Area [%] | Height [%] | W05 [min] | PDA Peak Purity |     |
|-------------------|--------------|--------------|----------|------------|-----------|-----------------|-----|
| 1                 | 12,233       | 139,633      | 9,482    | 1,8        | 1,6       | 0,18            | 855 |
| 2                 | 12,633       | 7783,171     | 592,556  | 98,2       | 98,4      | 0,20            | 508 |
| Total             |              | 7922,804     | 602,037  | 100,0      | 100,0     |                 |     |

### 3.12 Cbl-C6-ATTO 633

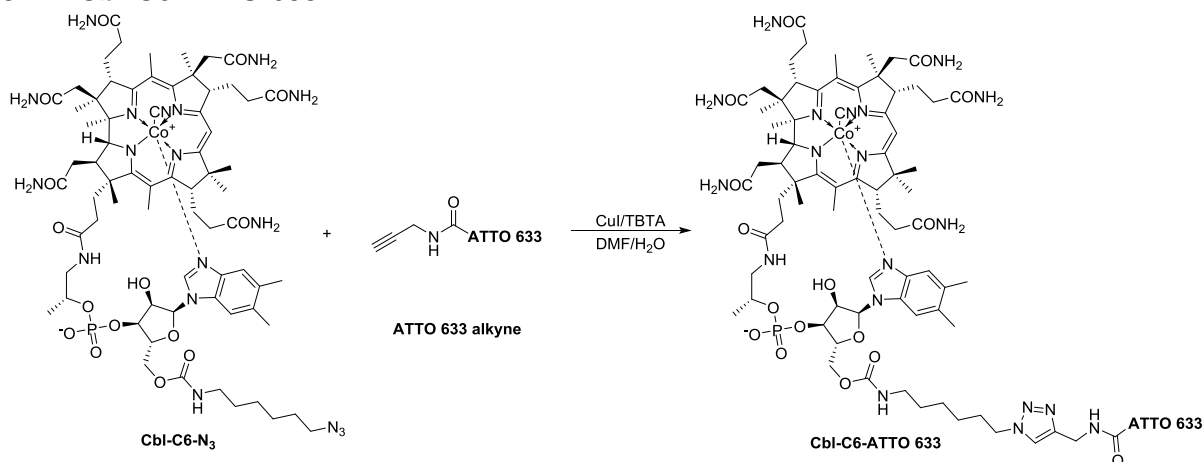

**Cbl-C6-ATTO 633:** Preparation of a catalyst solution: CuI (1 mg, 5 μmol) and TBTA (5 mg, 10 μmol) were dissolved in DMF (2 mL) and stirred for 20 min. Cbl-C6-N<sub>3</sub> (3 mg, 1.97 μmol) and ATTO 633 alkyne (0.5 mg, 0.72 μmol) were dissolved in DMF/H<sub>2</sub>O (200 μL, 1:1, v/v) and subsequently freshly prepared catalyst solution (300 μL) was added and the reaction mixture was stirred overnight. Then it was diluted with DMF (1 mL), poured into AcOEt (10 mL) and the precipitate was centrifuged and dried. The crude solid was dissolved in MeOH (1 mL), precipitated with Et<sub>2</sub>O (10 mL), and then centrifuged. The dried solid was then dissolved in H<sub>2</sub>O, loaded onto RP column (10 mL) and purified crude product was purified by RP column chromatography gradually with MeCN/H<sub>2</sub>O from 20 to 50% v/v yielding blue solid. LRMS (ESI) m/z [M + Na + H]<sup>2+</sup> found, 1067.51.

**HPLC Method:**

| Time [min]     | H <sub>2</sub> O+0.2%TFA [%] | MeCN[%] | λ [nm] | R <sub>t</sub> [min] |
|----------------|------------------------------|---------|--------|----------------------|
| <b>Initial</b> | 99                           | 1       | 633    | 12.68                |
| <b>15</b>      | 30                           | 70      |        |                      |
| <b>20</b>      | 30                           | 70      |        |                      |
| <b>30</b>      | 5                            | 95      |        |                      |

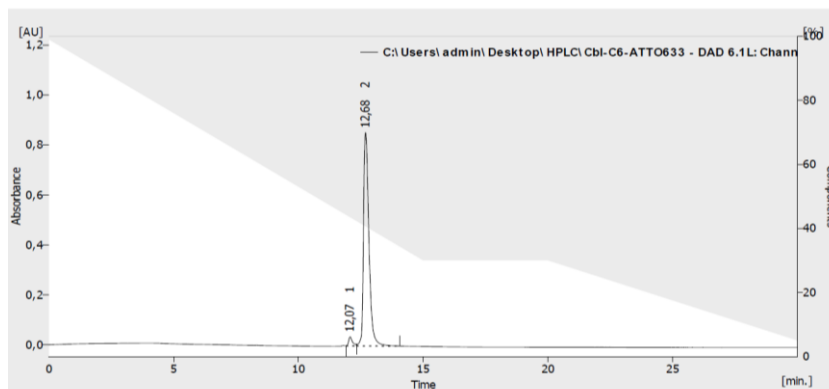

Result Table (Uncal - C:\Users\admin\Desktop\HPLC\Cbl-C6-ATTO633 - DAD 6.1L: Channel 3)

|   | Reten. Time [min] | Area [mAU.s] | Height [mAU] | Area [%] | Height [%] | W05 [min] | PDA Peak Purity |
|---|-------------------|--------------|--------------|----------|------------|-----------|-----------------|
| 1 | 12,067            | 387,217      | 36,352       | 2,9      | 4,1        | 0,17      | 873             |
| 2 | 12,683            | 12923,830    | 854,169      | 97,1     | 95,9       | 0,25      | 518             |
|   | Total             | 13311,047    | 890,520      | 100,0    | 100,0      |           |                 |

## 4. NMR spectra

### 4.1 NMR spectra of Cbl-2xPEG-N<sub>3</sub> recorded in CD<sub>3</sub>OD

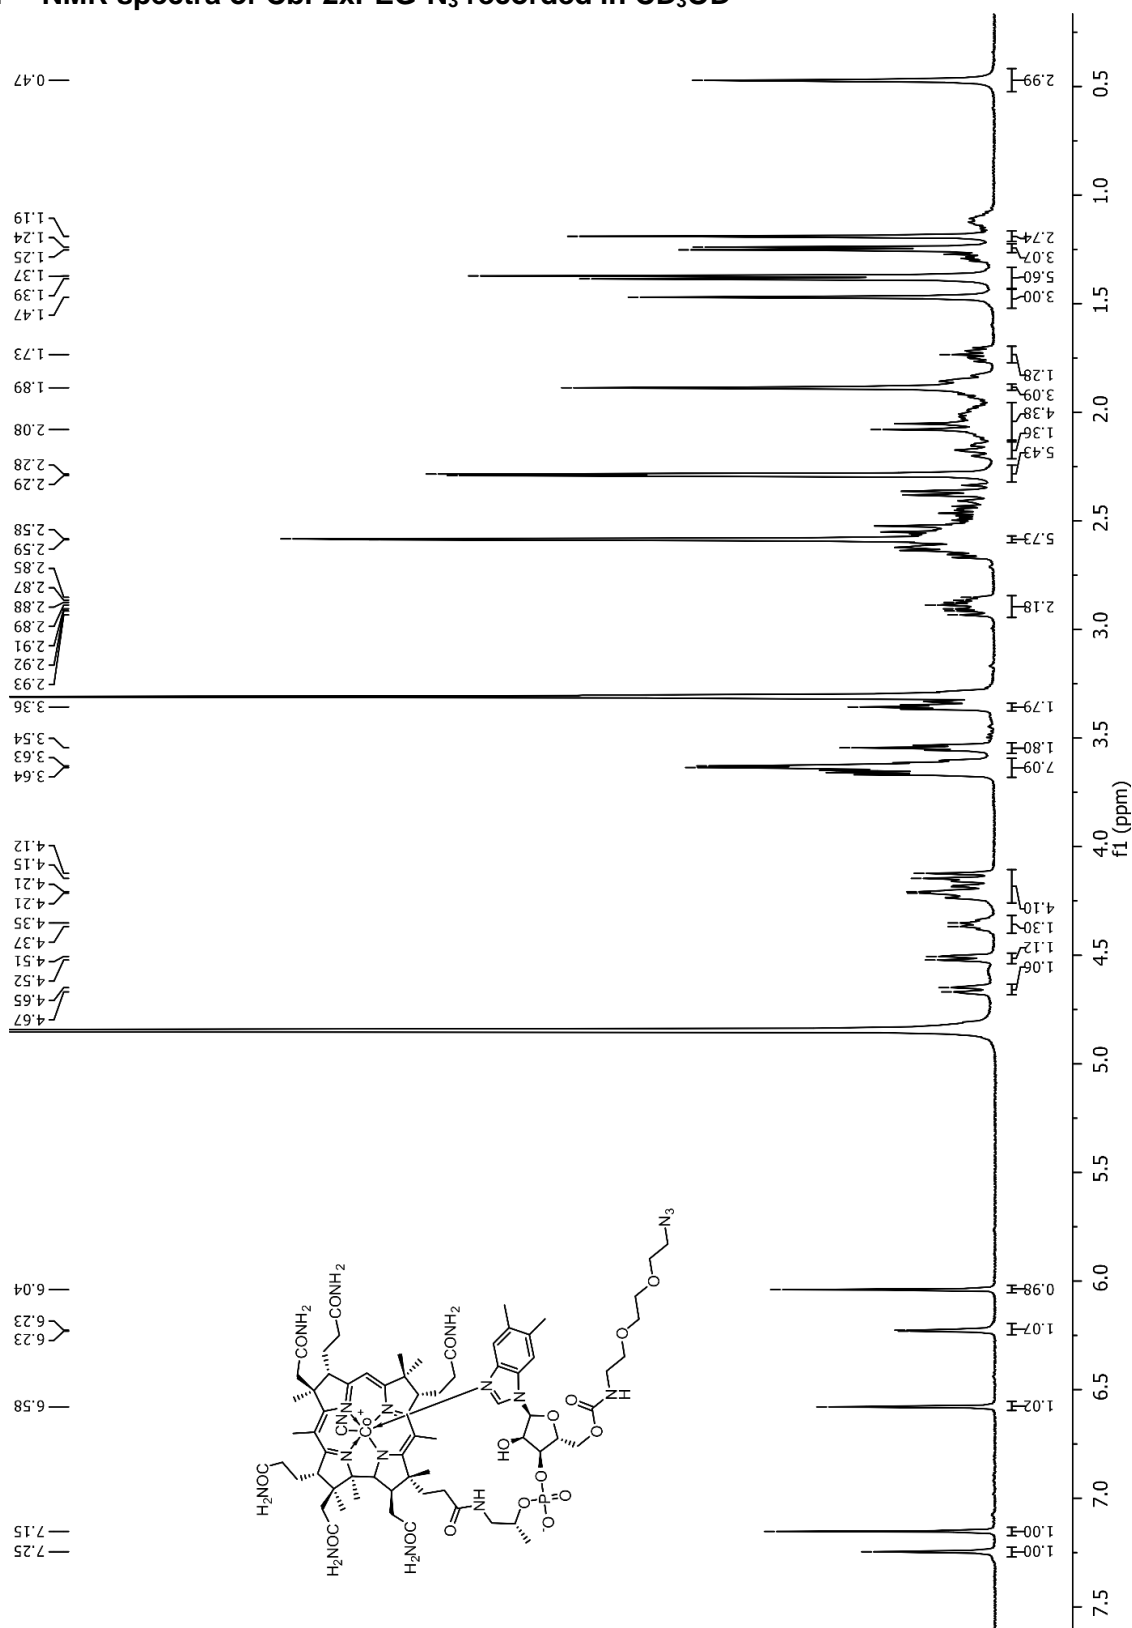

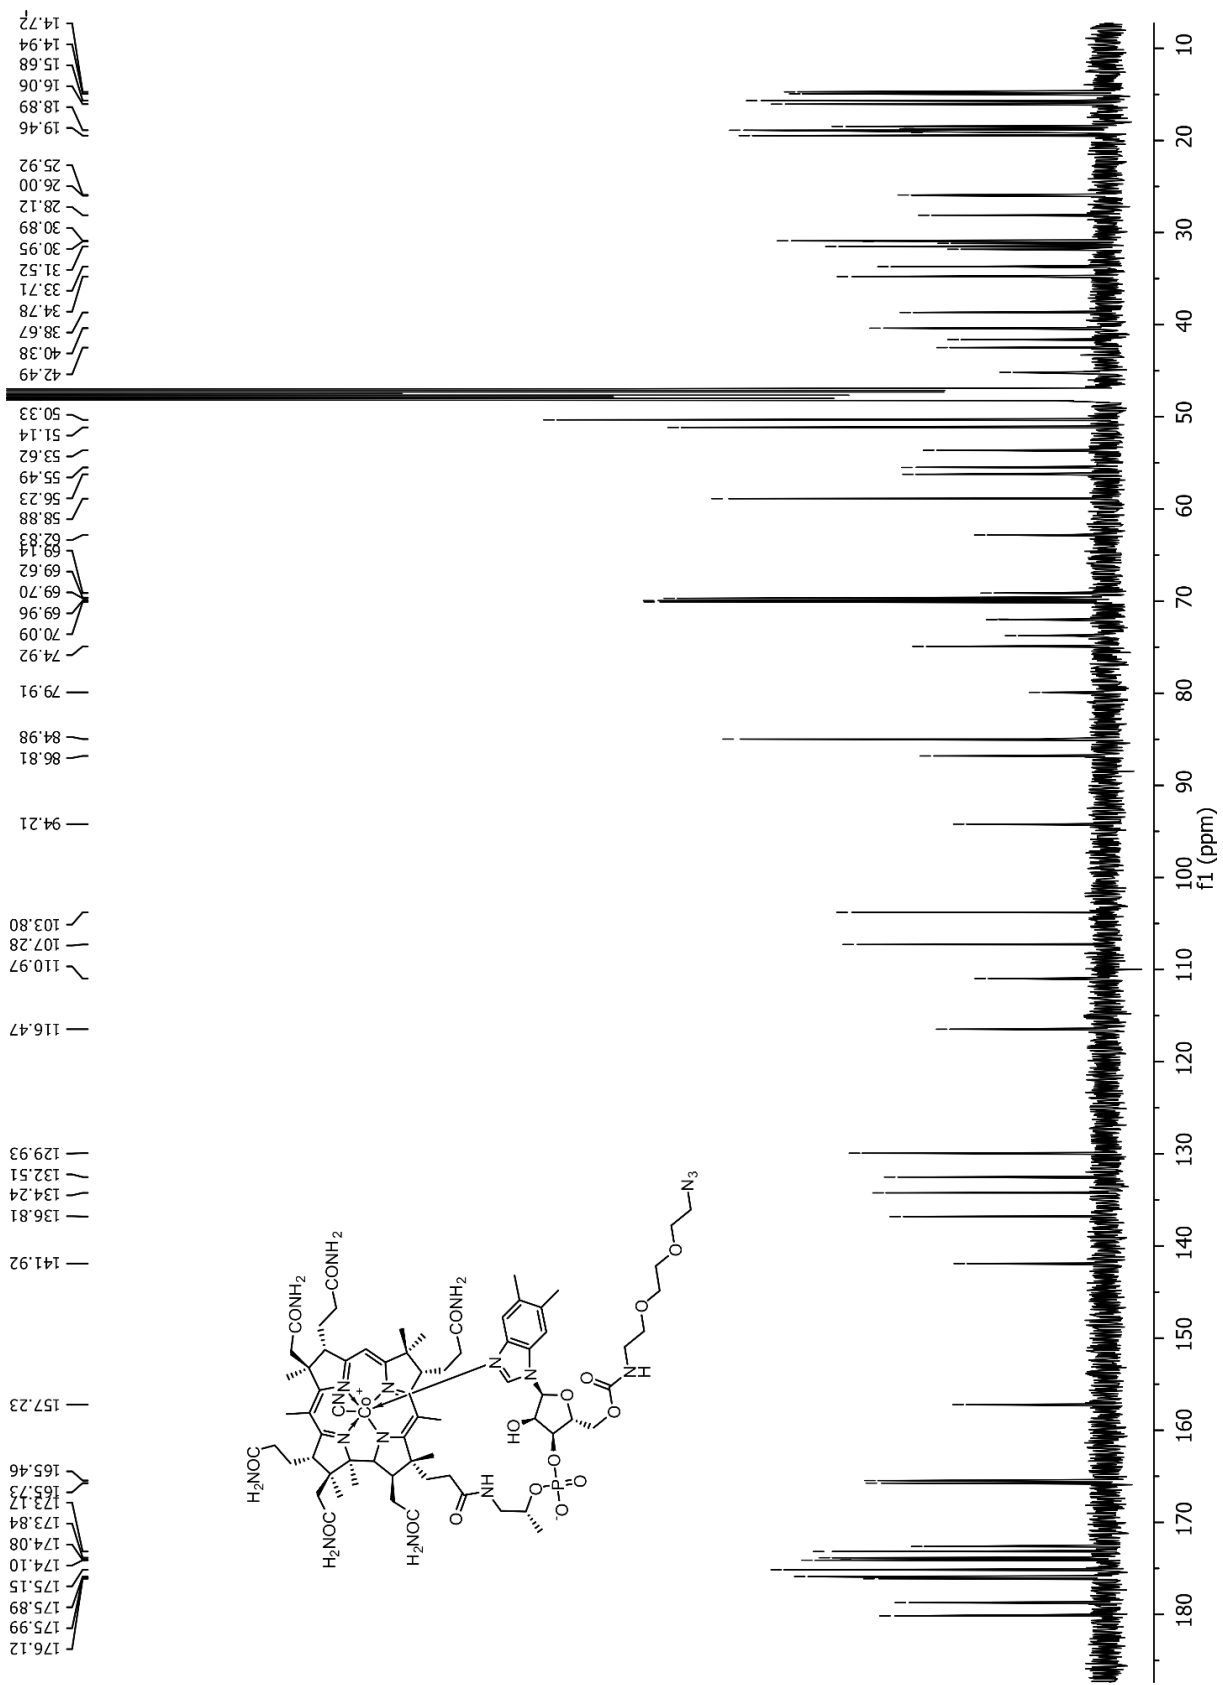

## 4.2 NMR spectra of Cbl-5xPEG-N<sub>3</sub> recorded in CD<sub>3</sub>OD

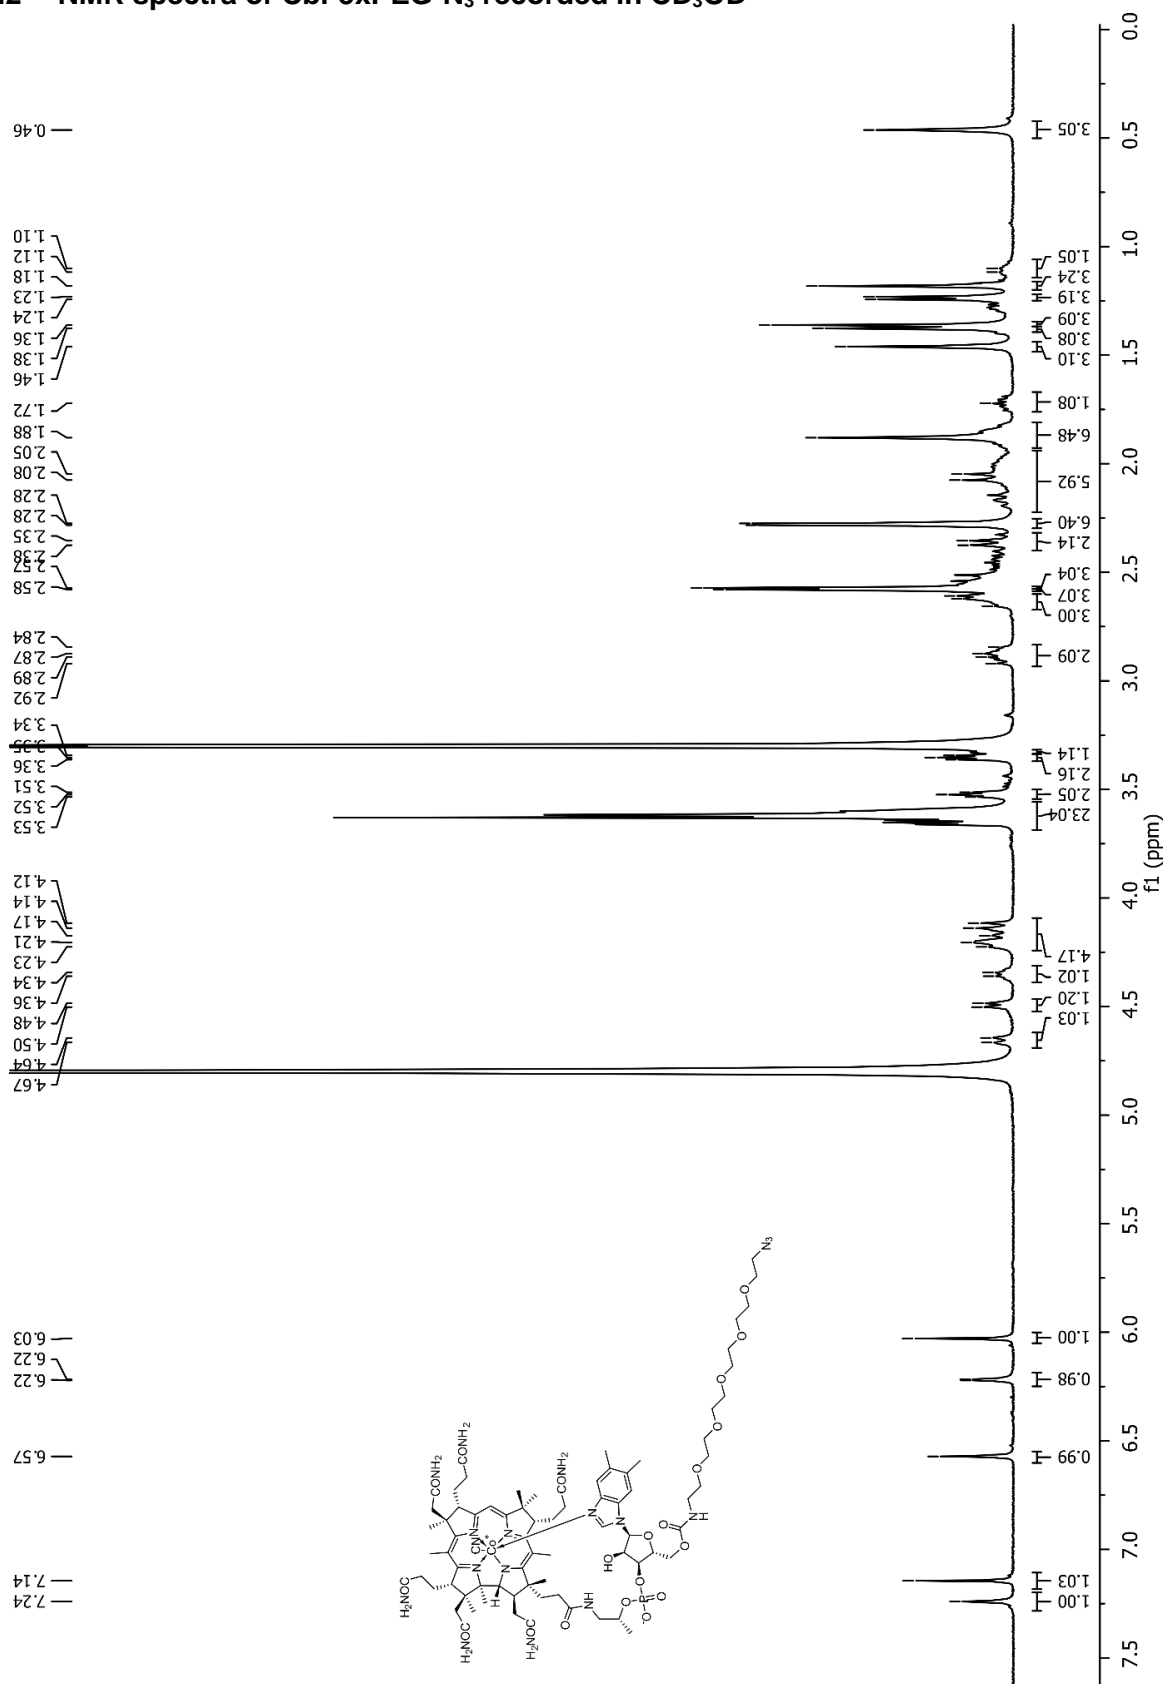

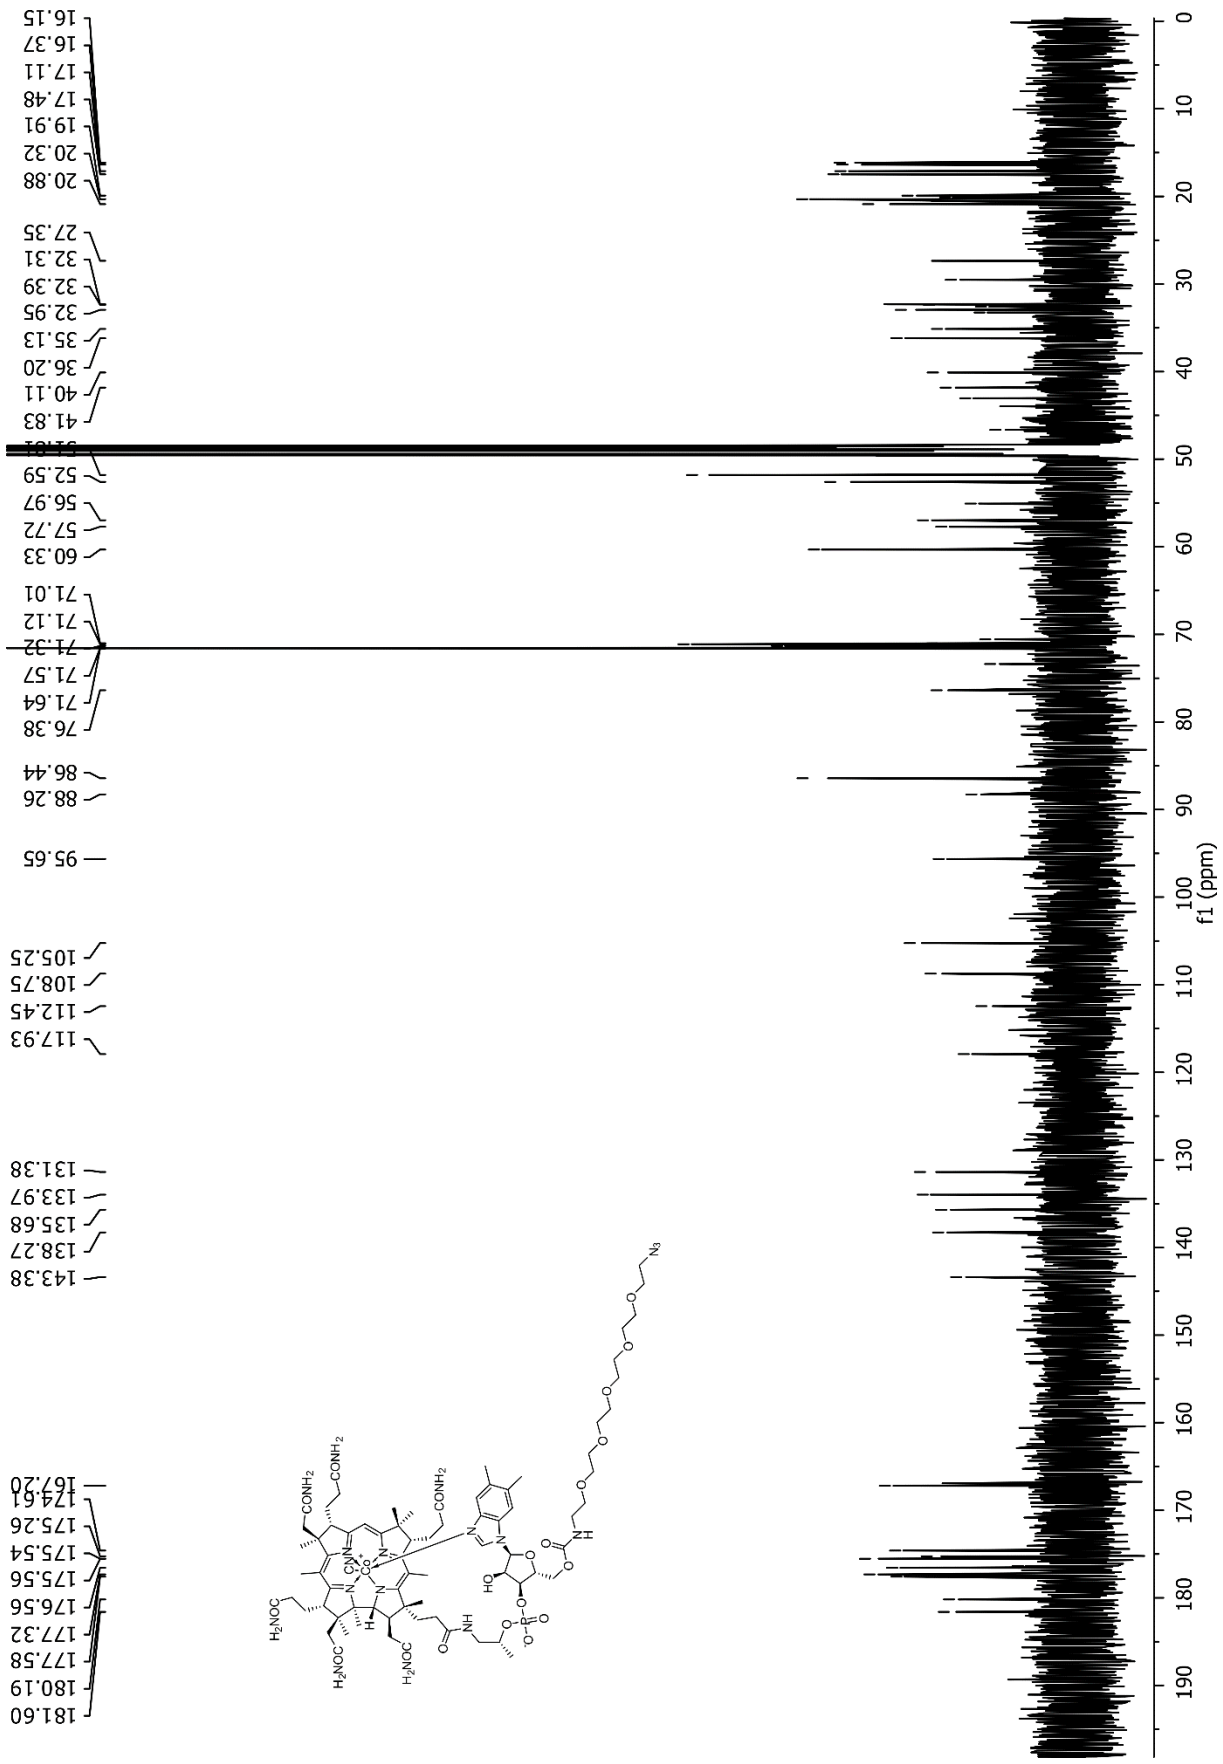

### 4.3 NMR spectra of Cbl-FAM recorded in CD<sub>3</sub>OD

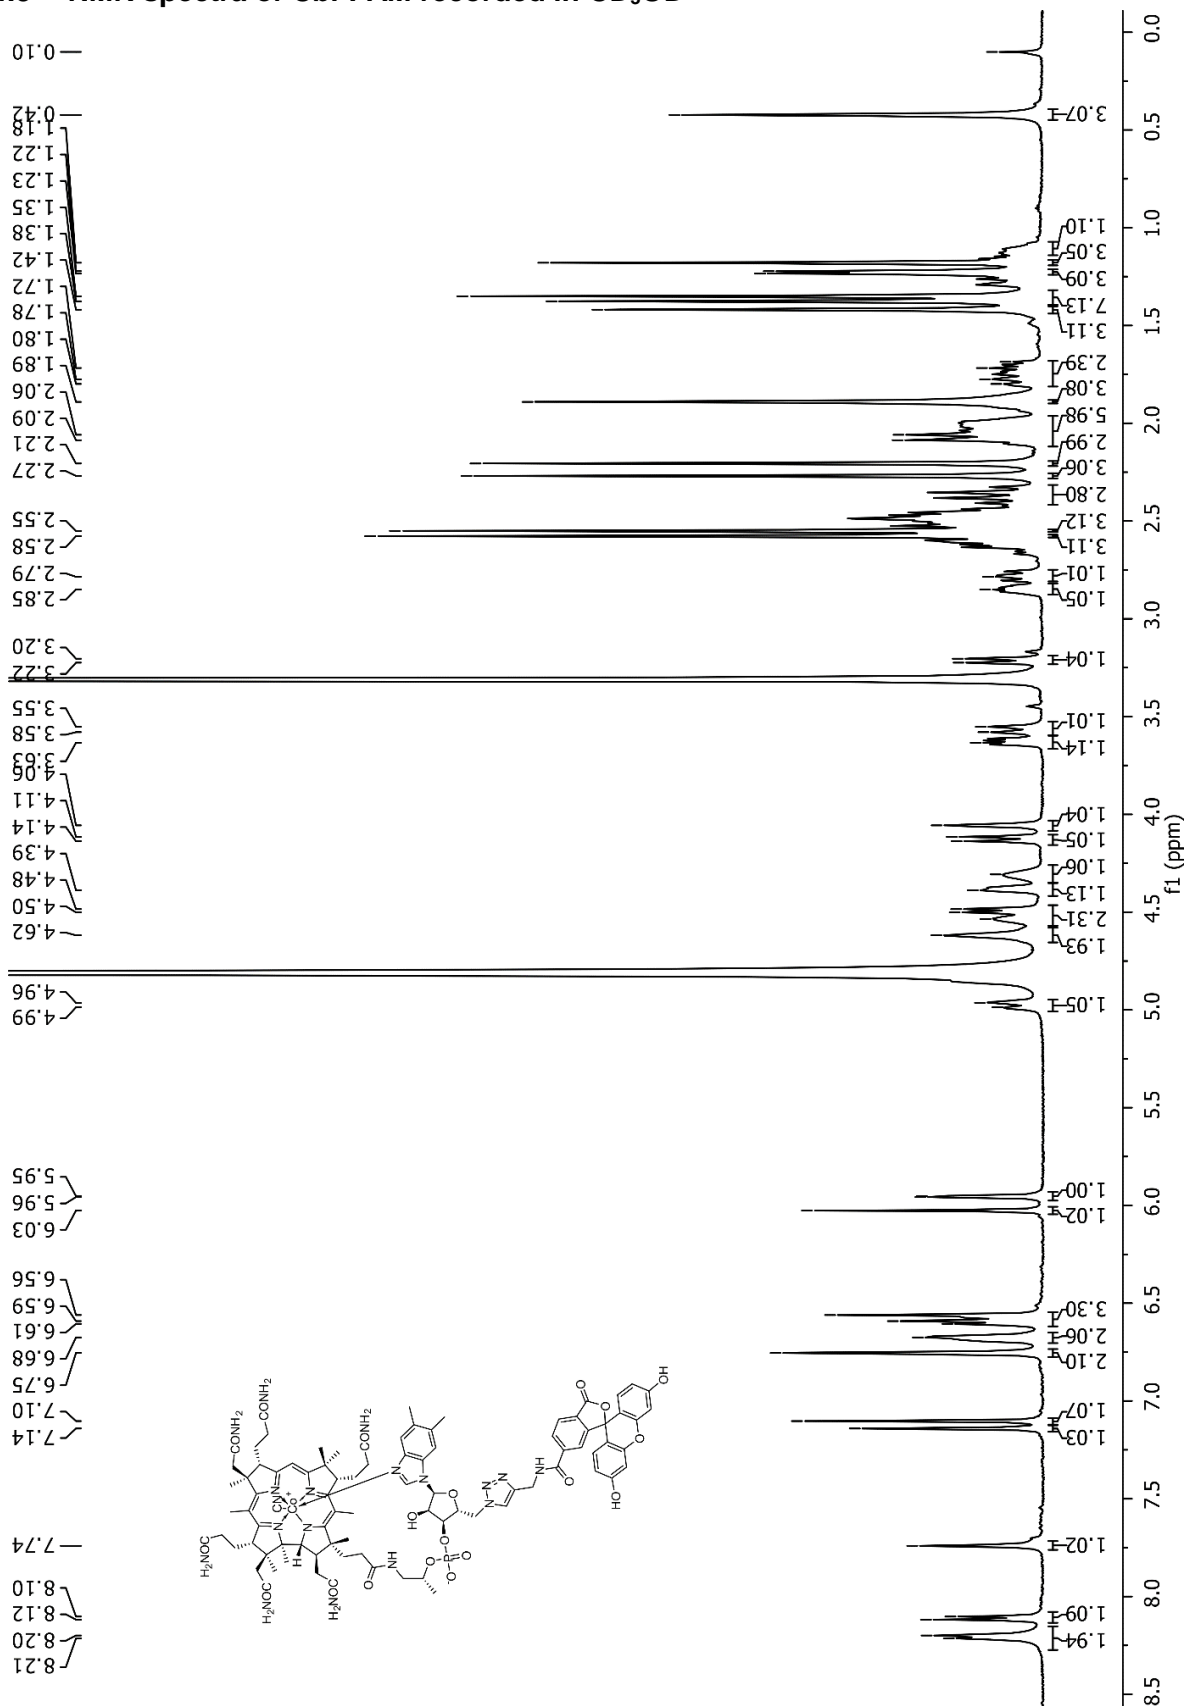



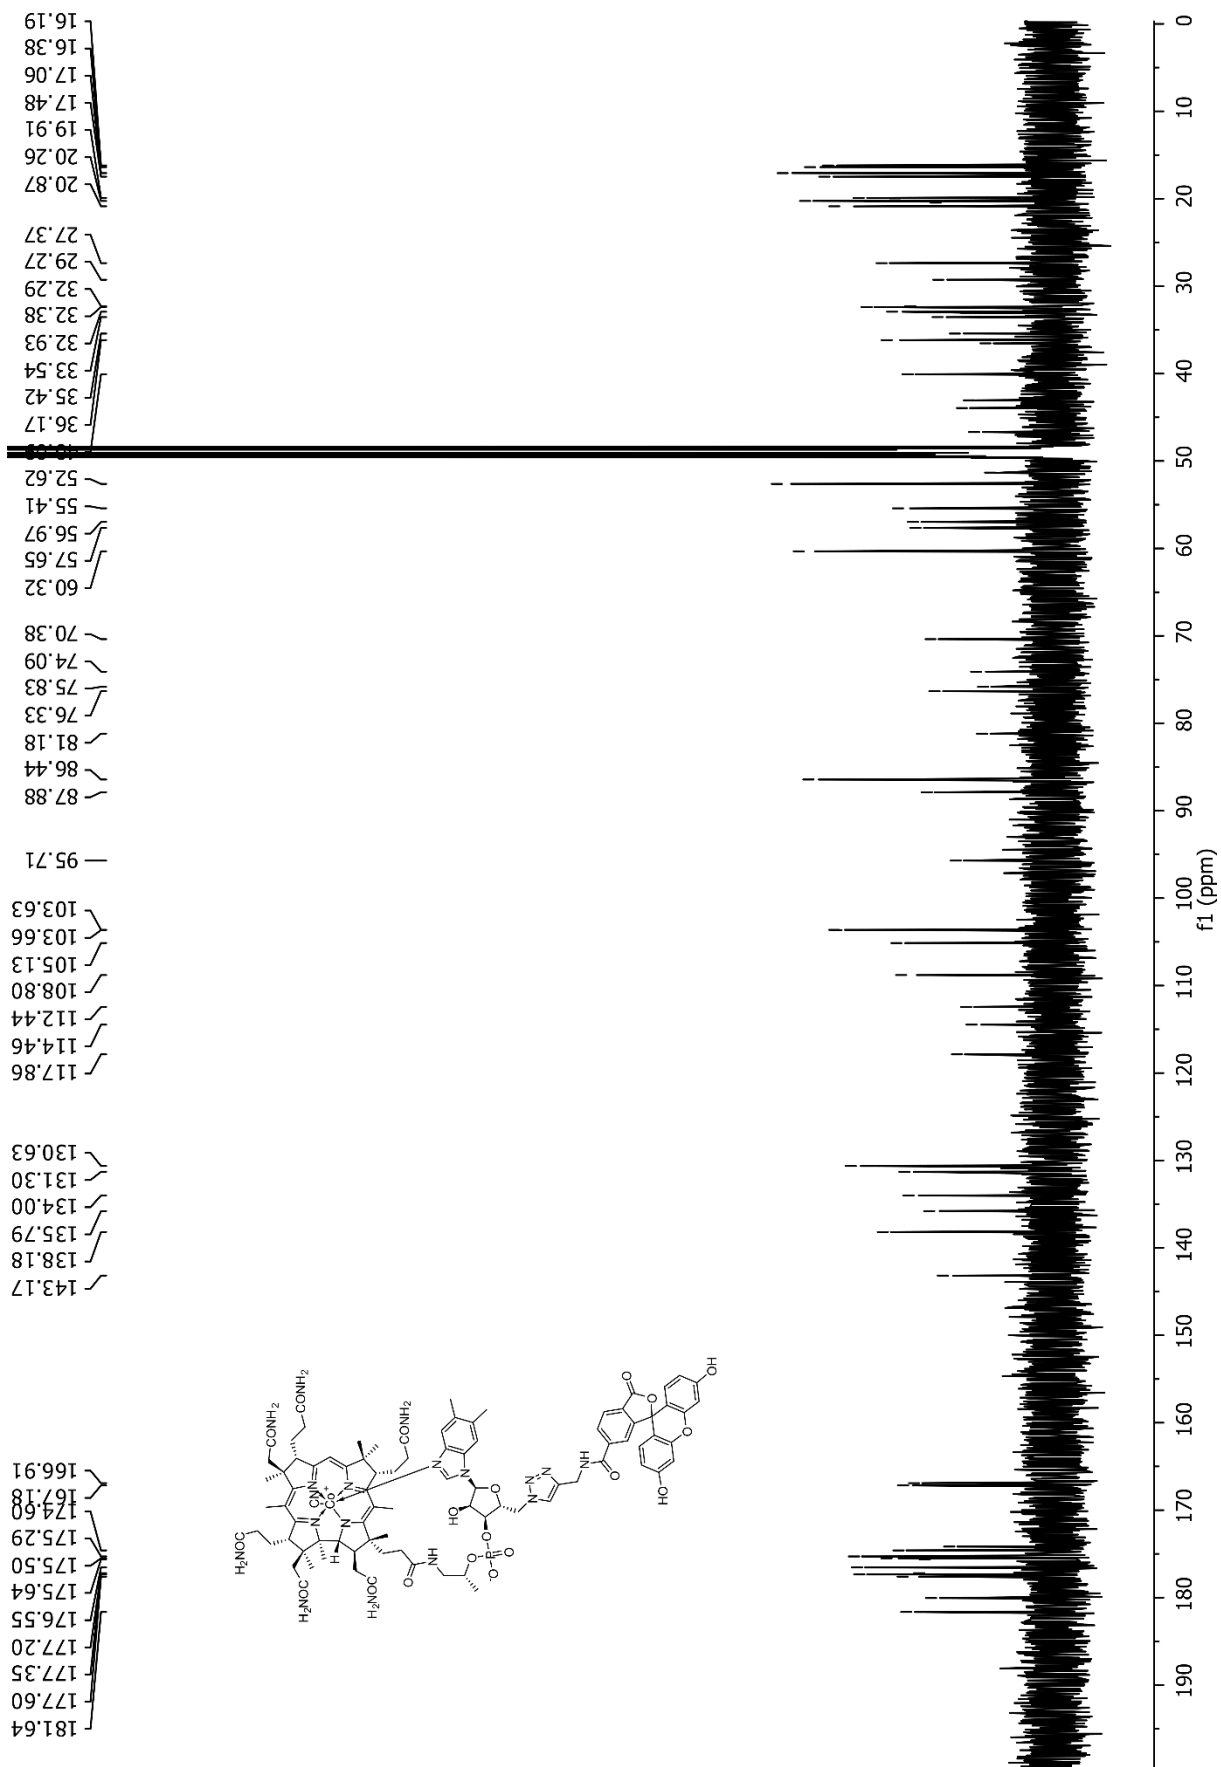

#### 4.4 NMR spectra of Cbl-C6-FAM recorded in CD<sub>3</sub>OD

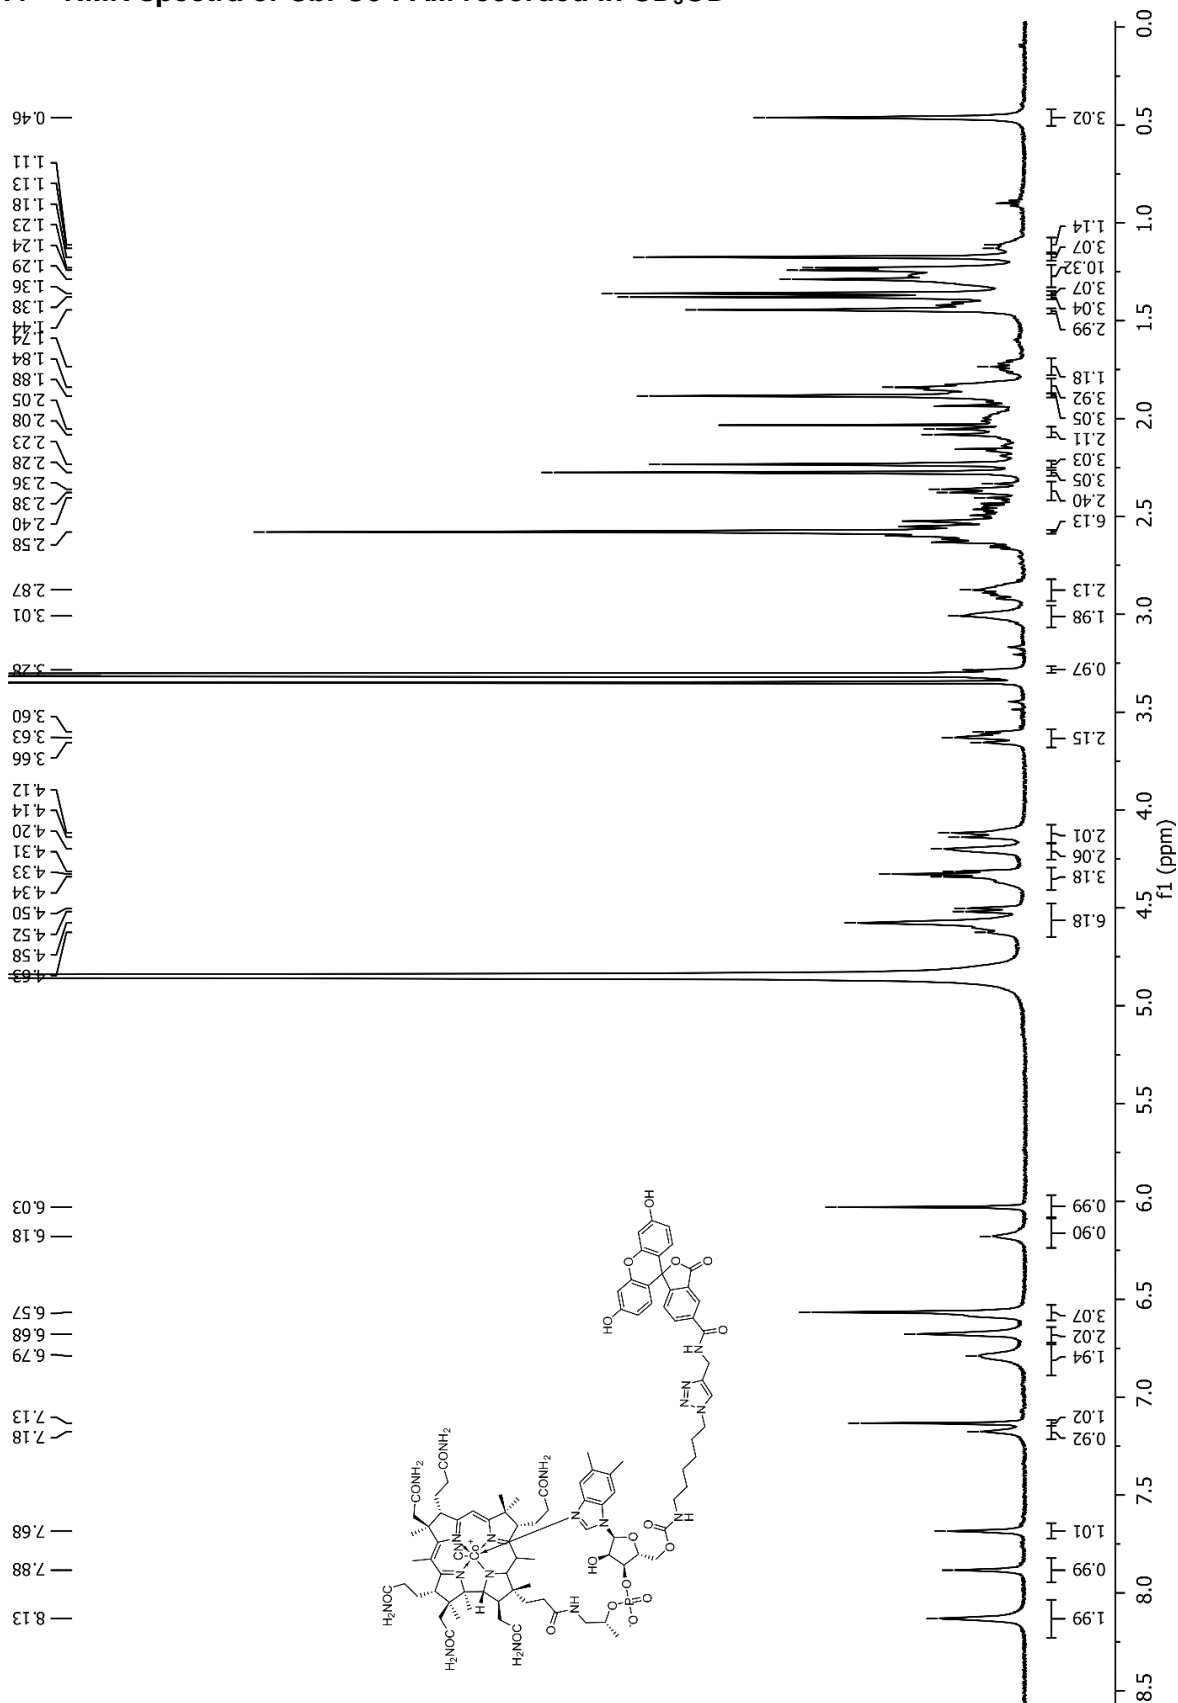

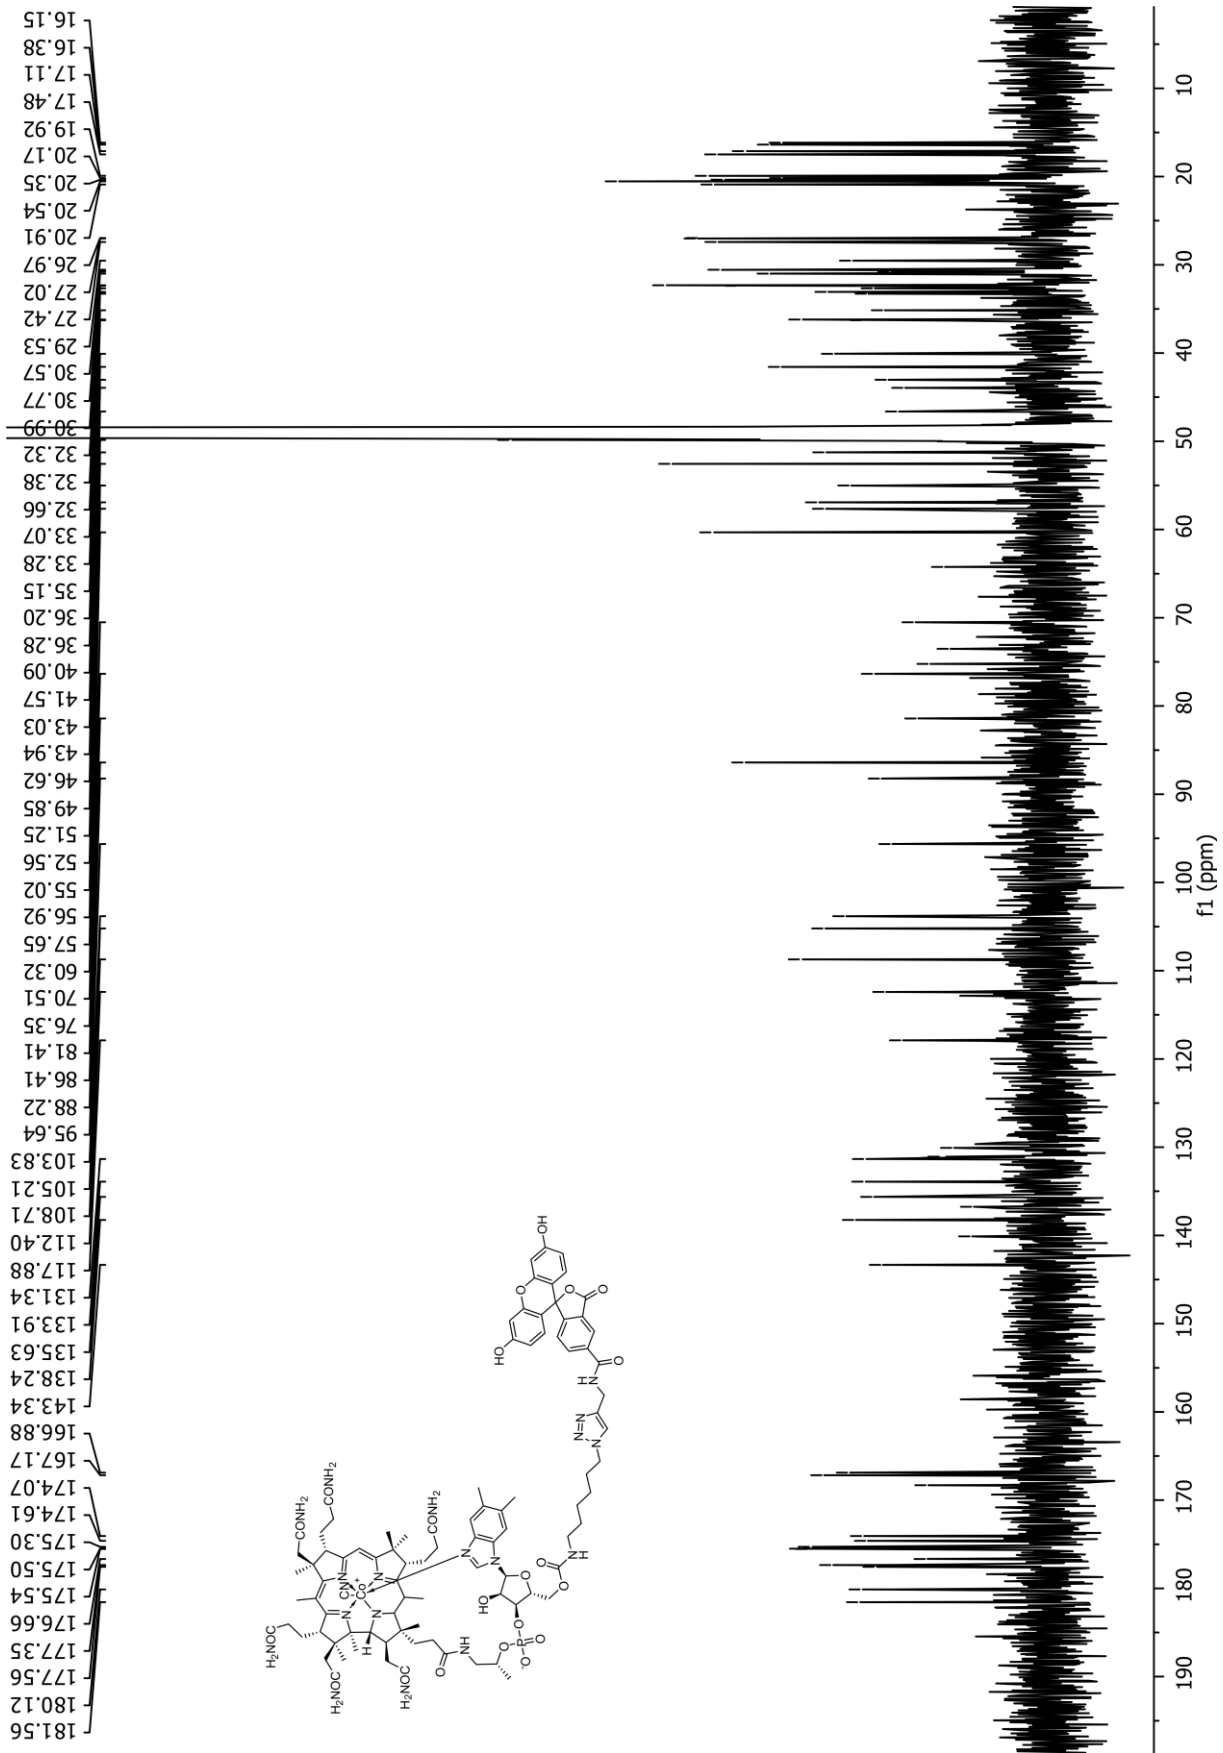

#### 4.5 NMR spectra of Cbl-1xPEG-FAM recorded in CD<sub>3</sub>OD

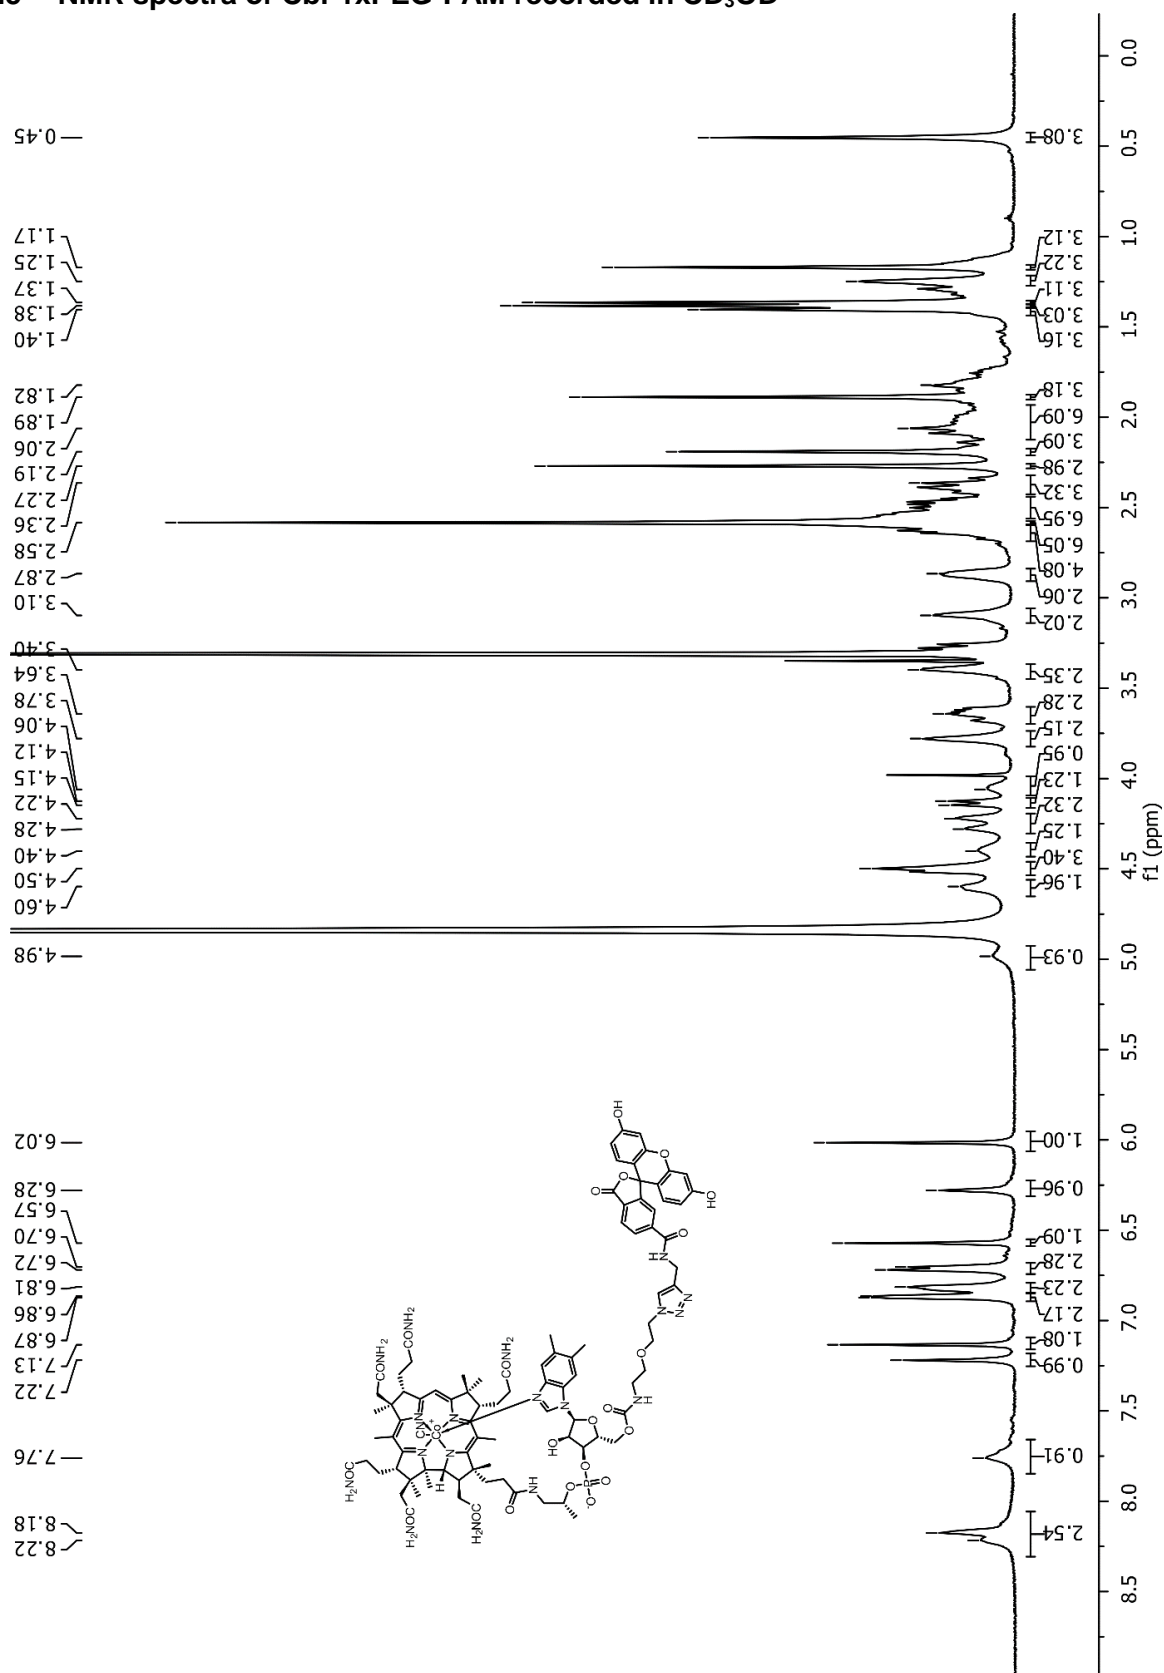

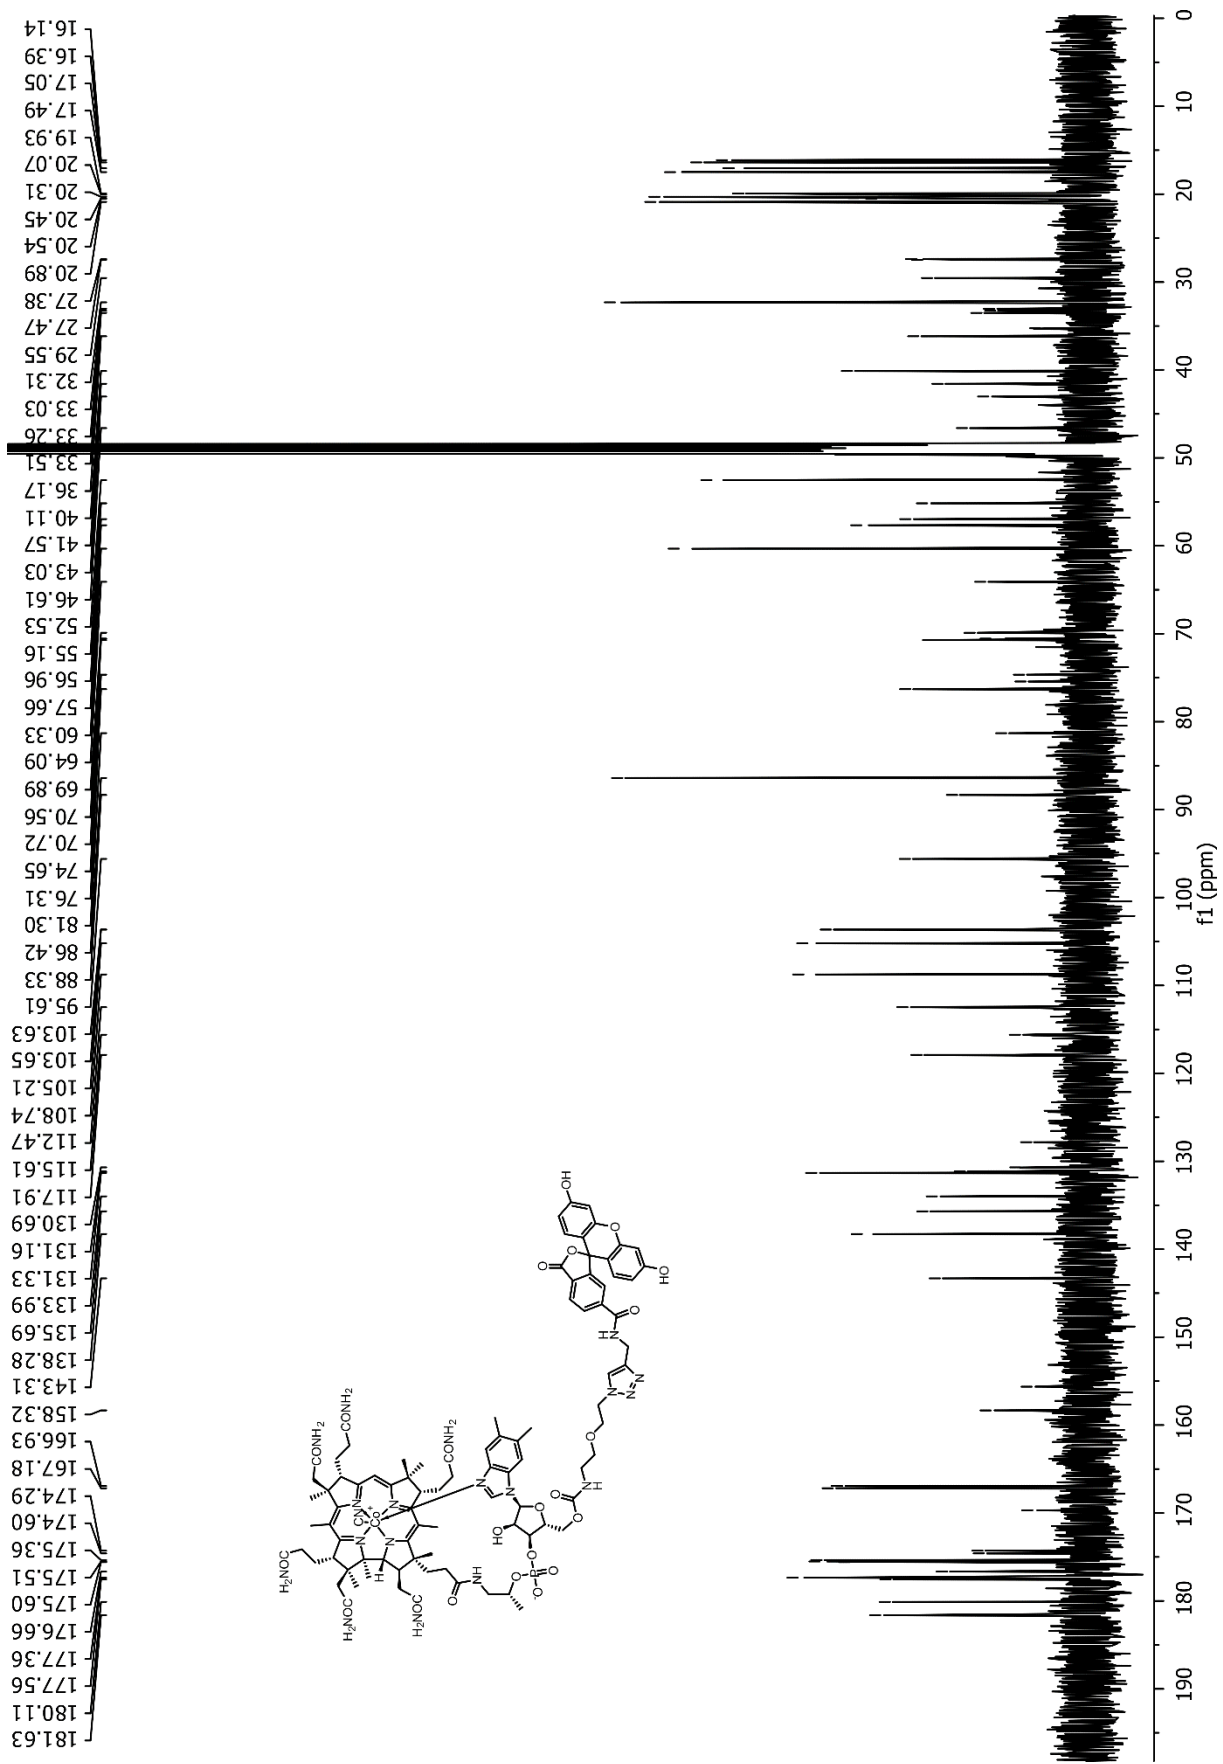

#### 4.6 NMR spectra of Cbl-2xPEG-FAM recorded in CD<sub>3</sub>OD

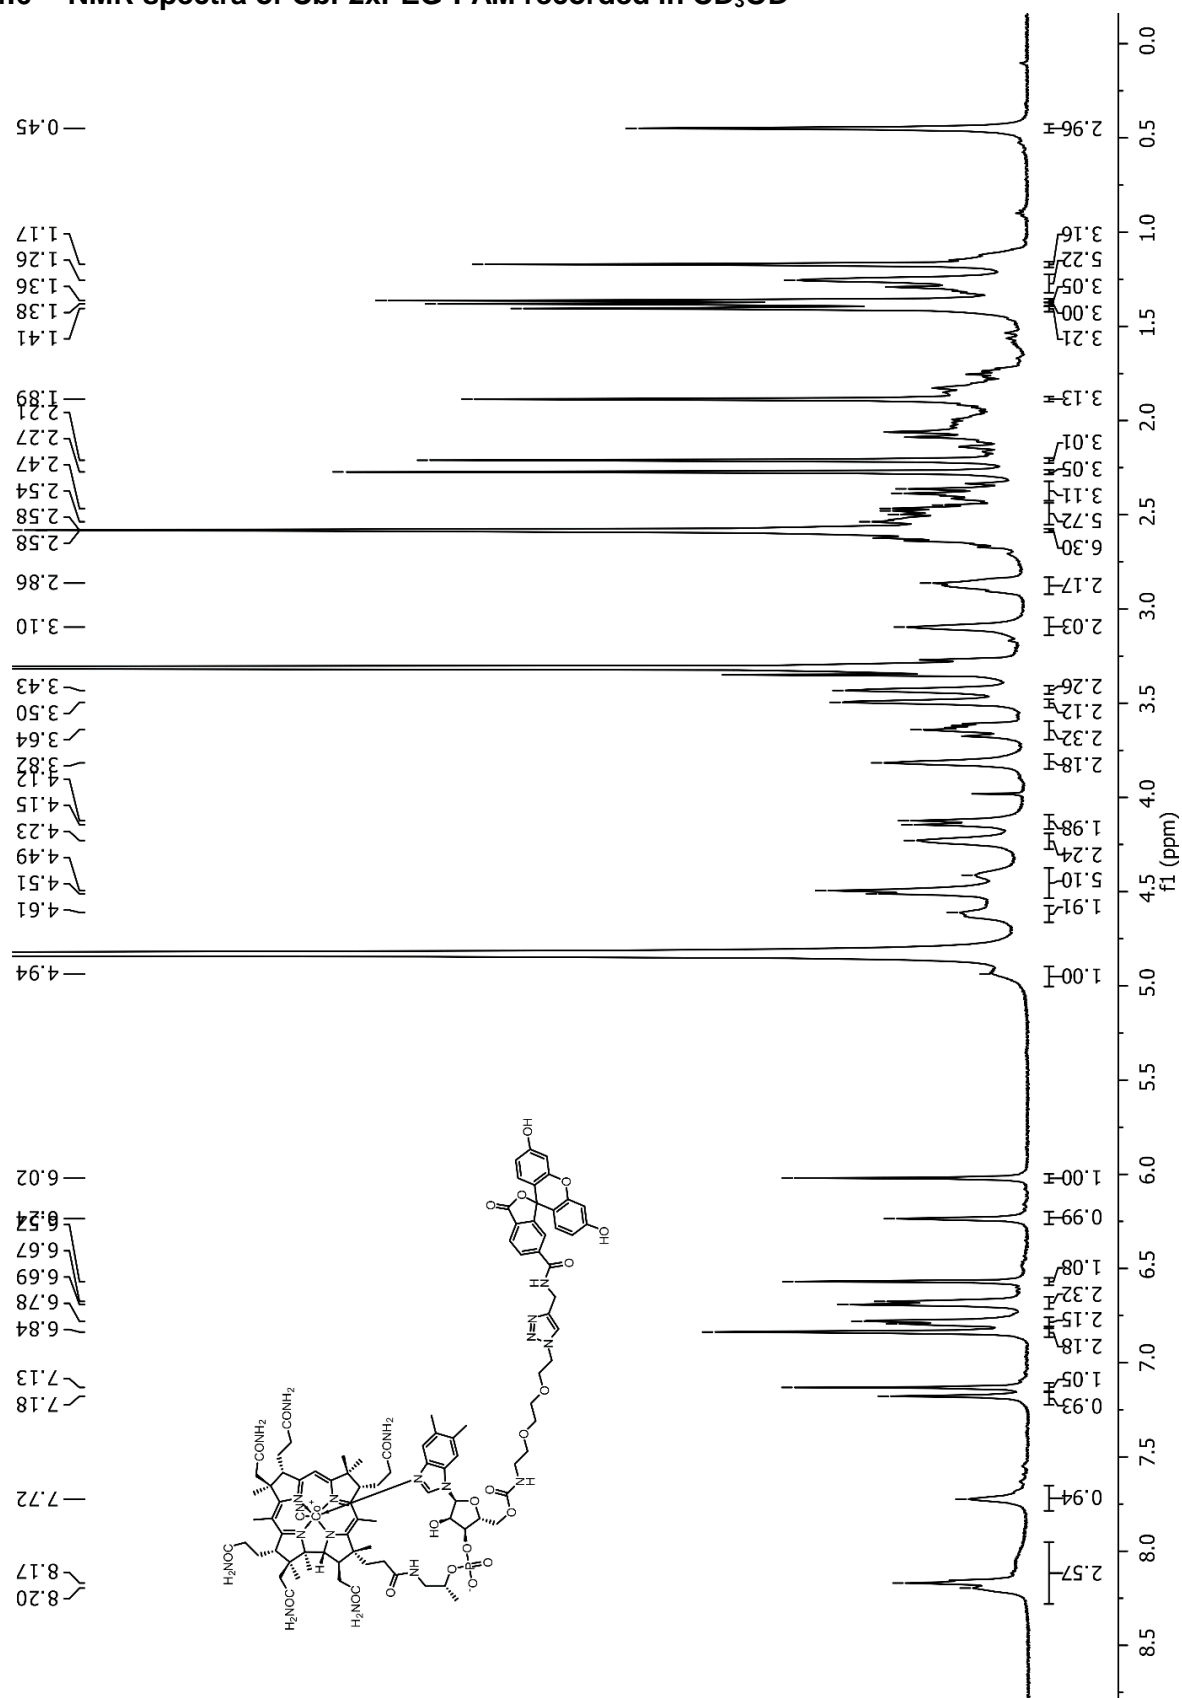

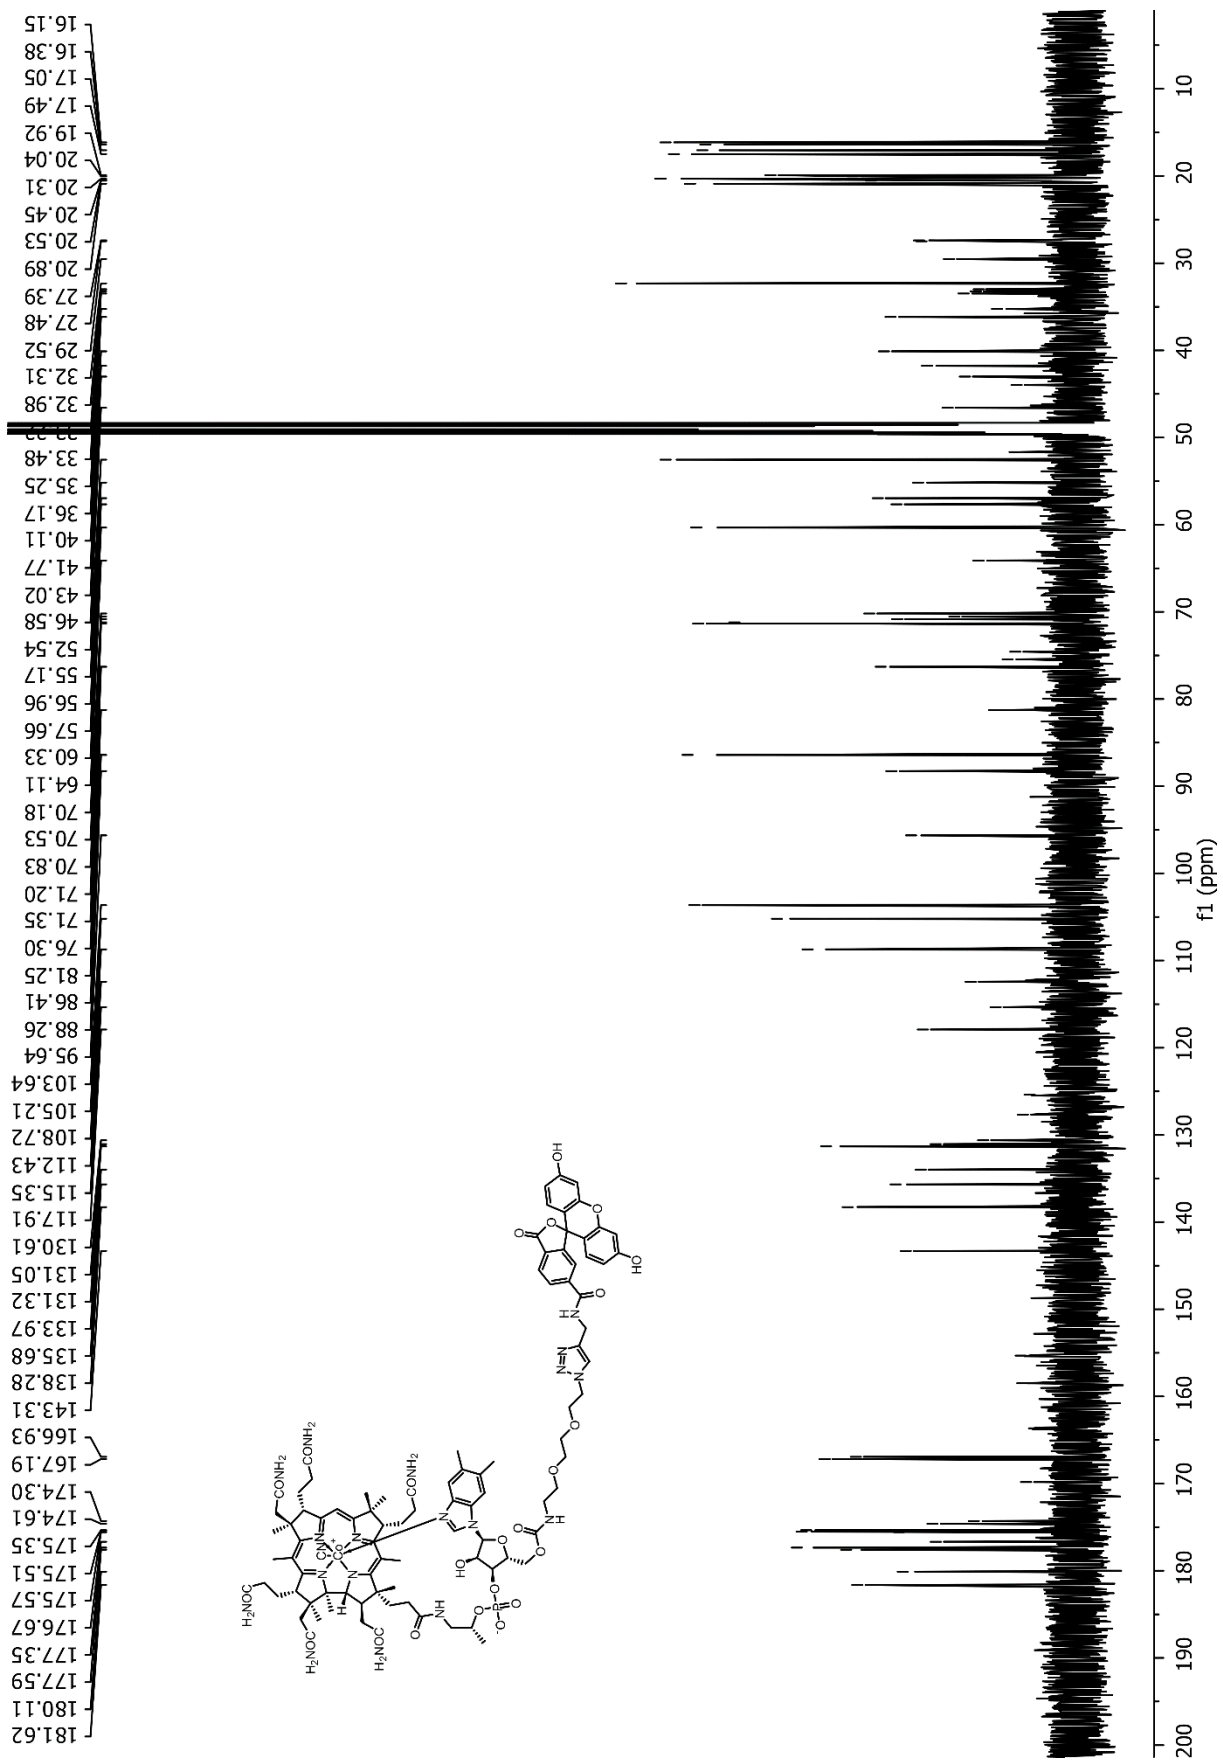

#### 4.7 NMR spectra of Cbl-3xPEG-FAM recorded in CD<sub>3</sub>OD

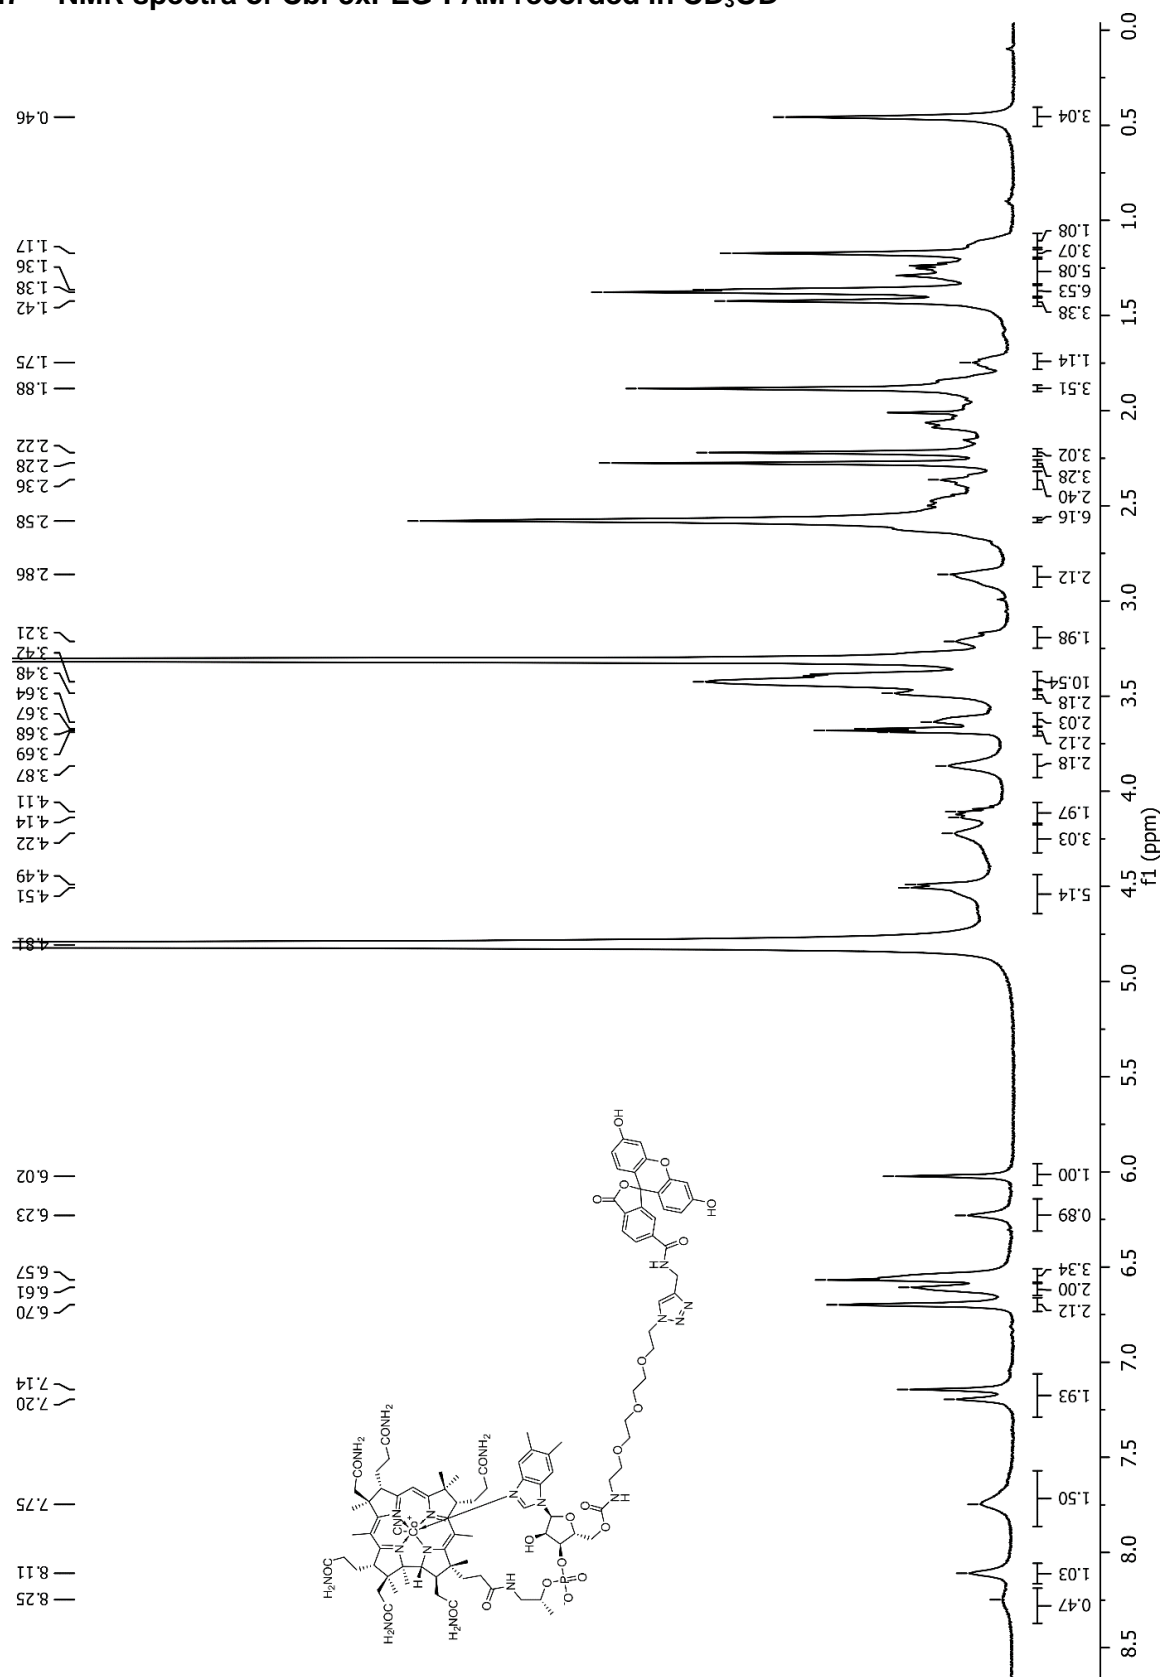



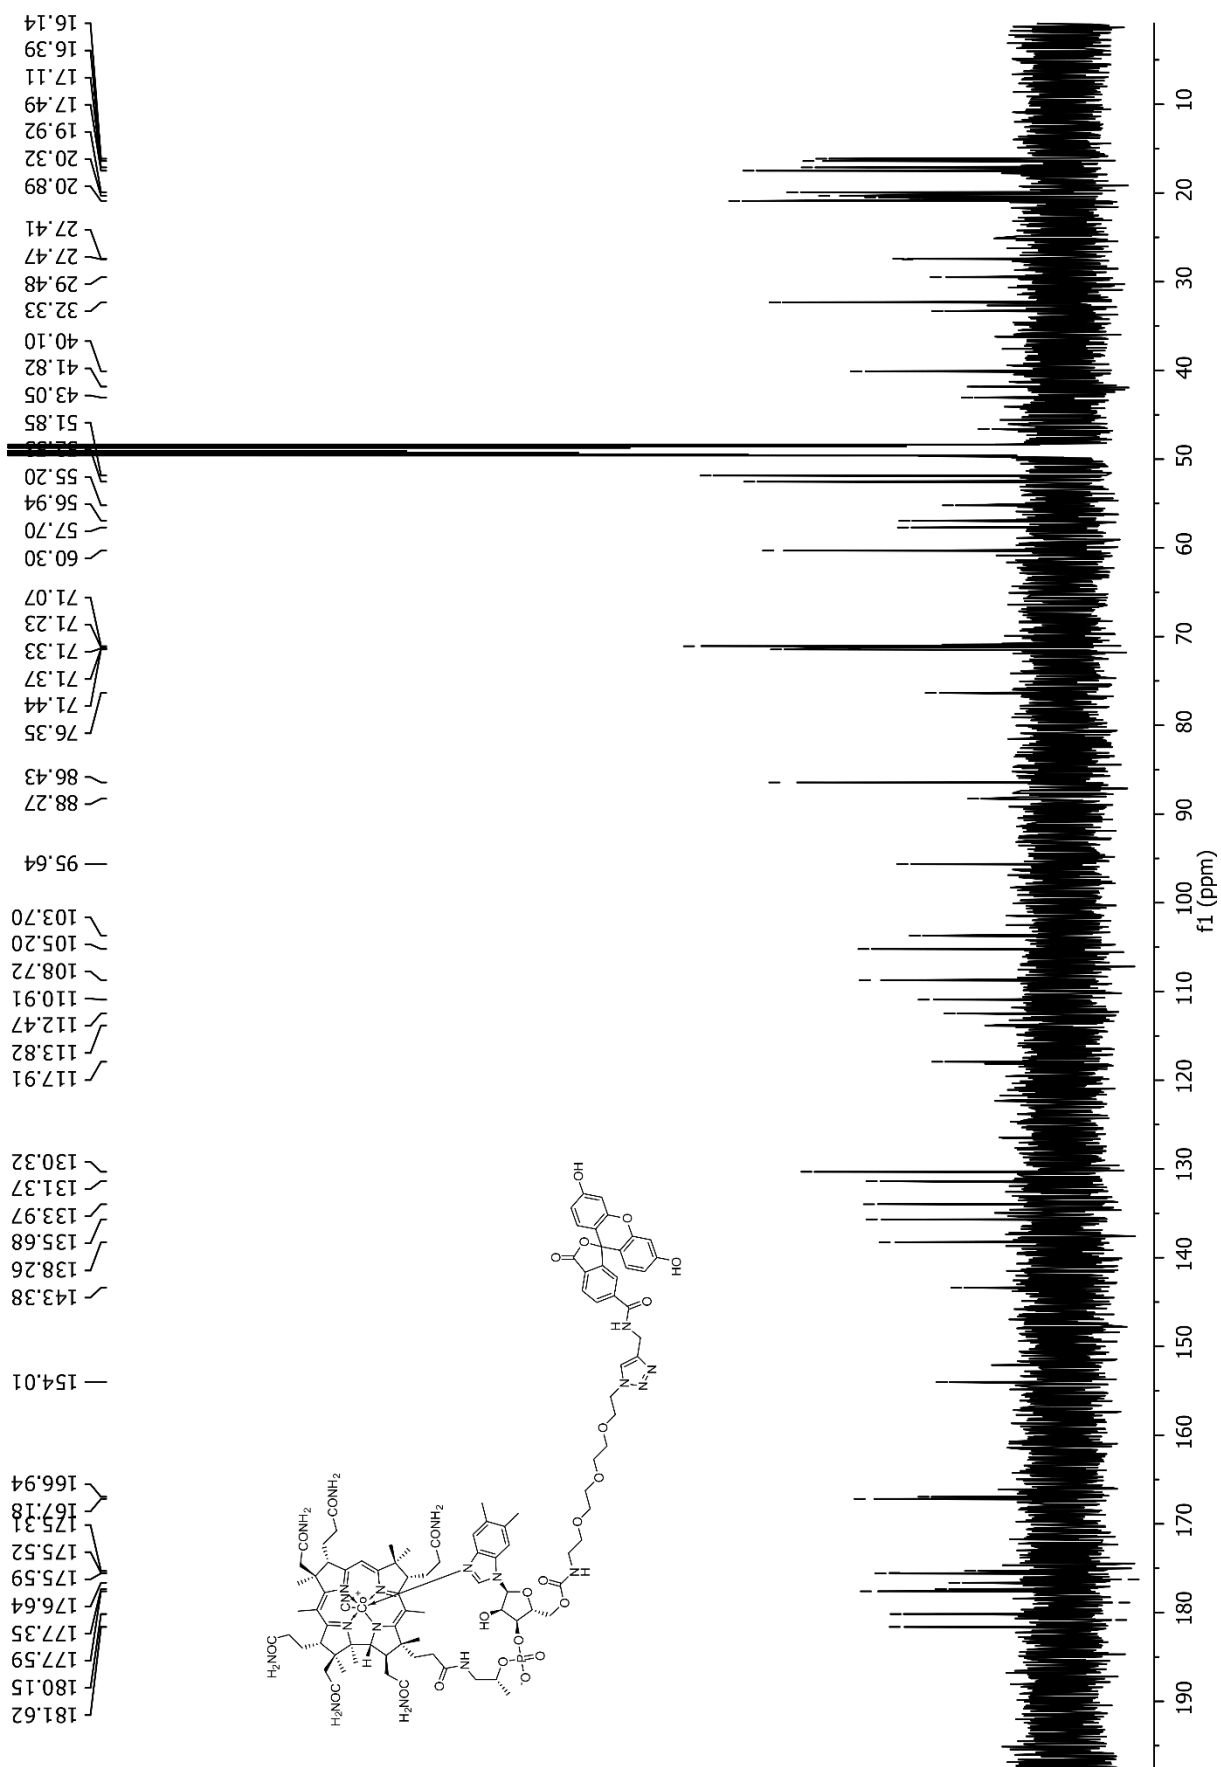

## 5. MS spectra

### 5.1 MS spectrum of Cbl-ATTO633

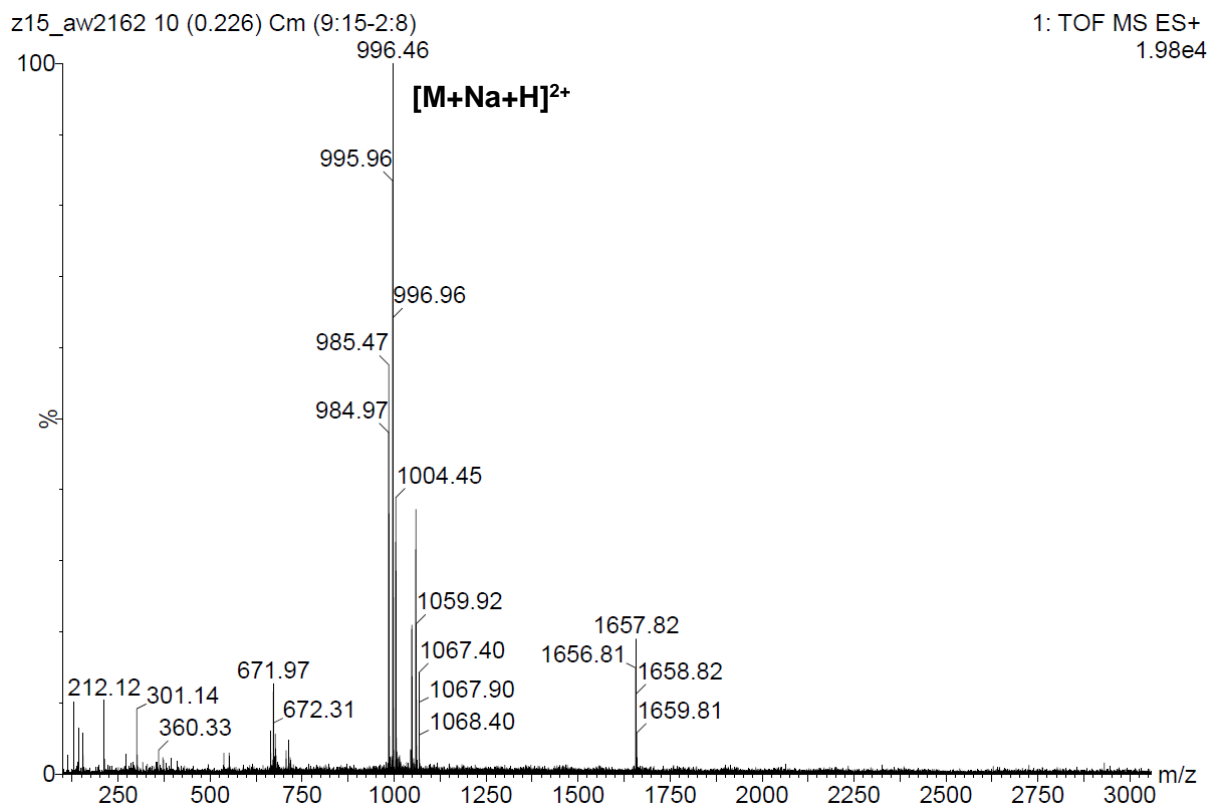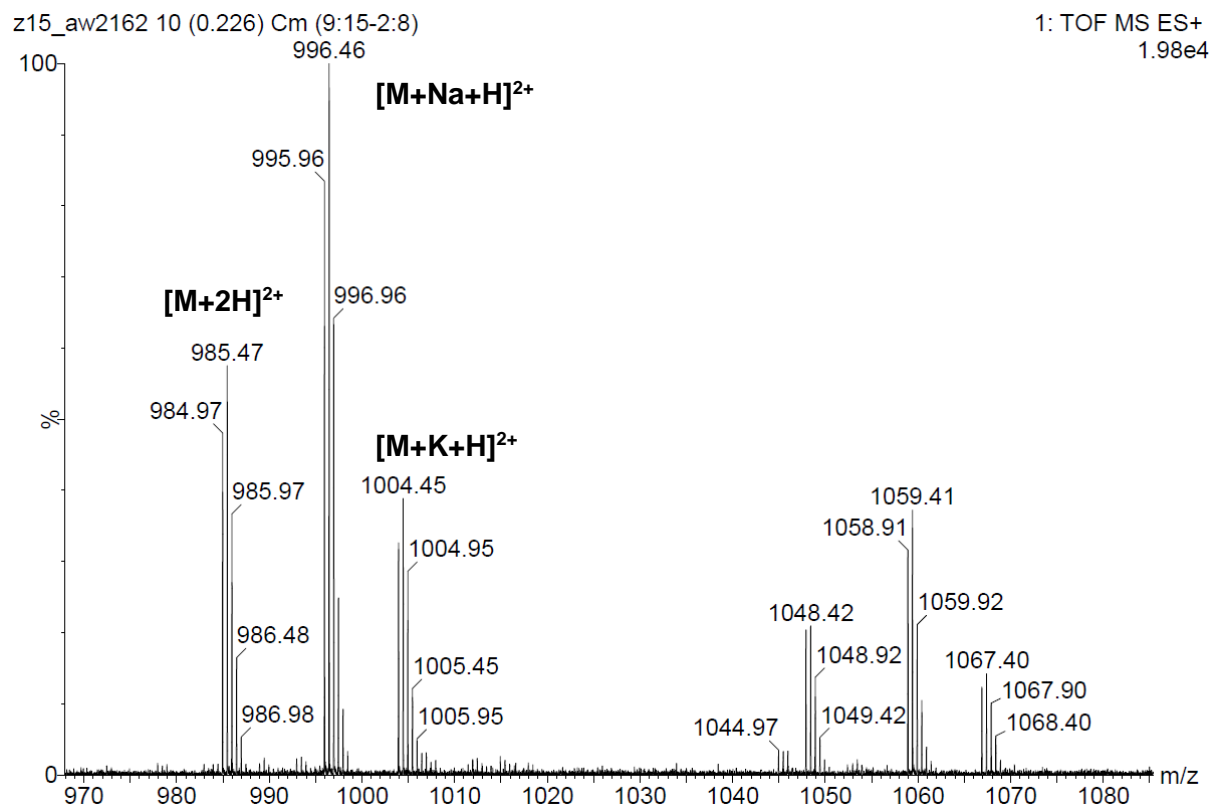

## 5.2 MS spectrum of Cbl-C6-ATTO633

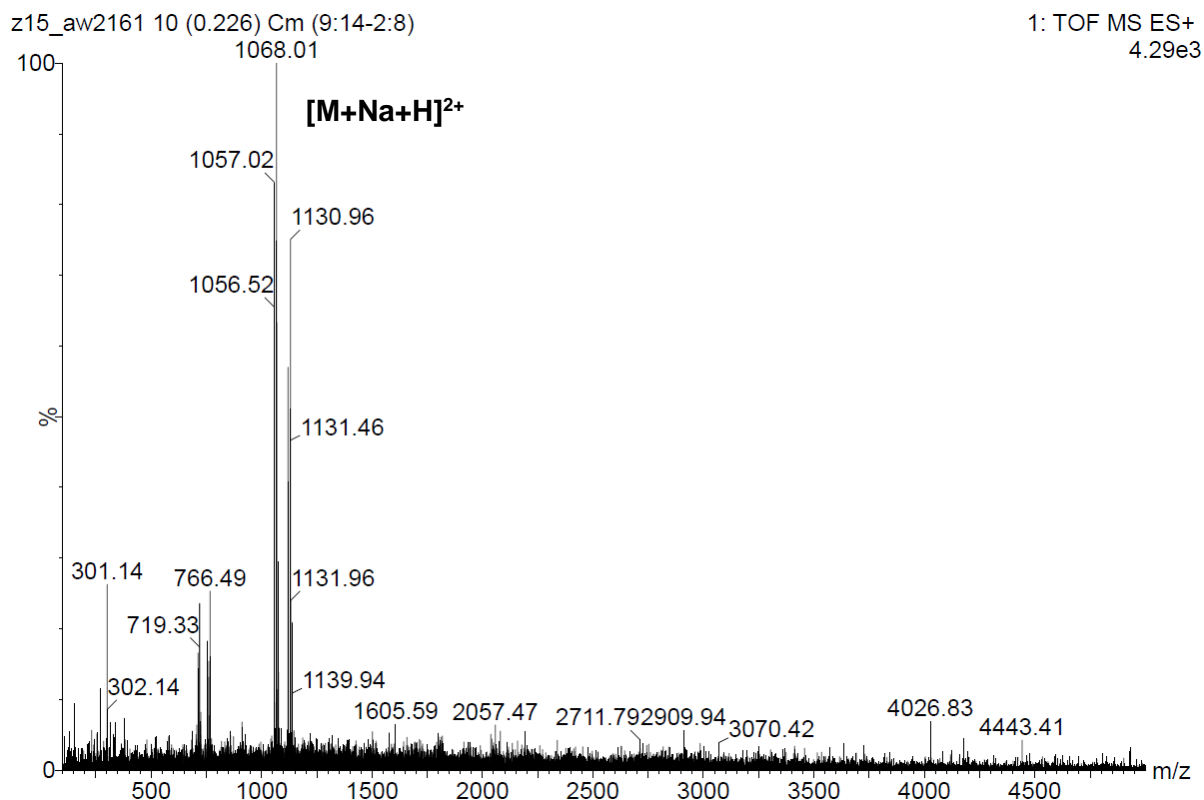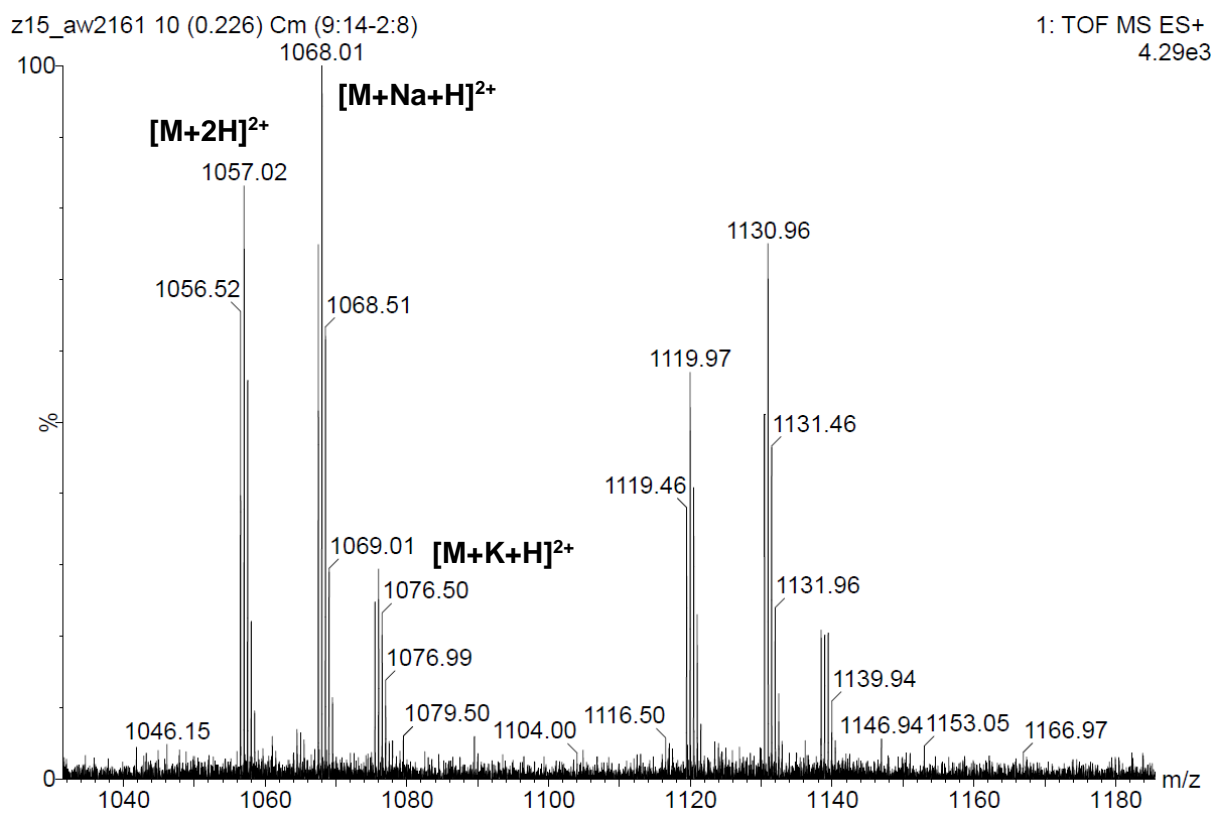

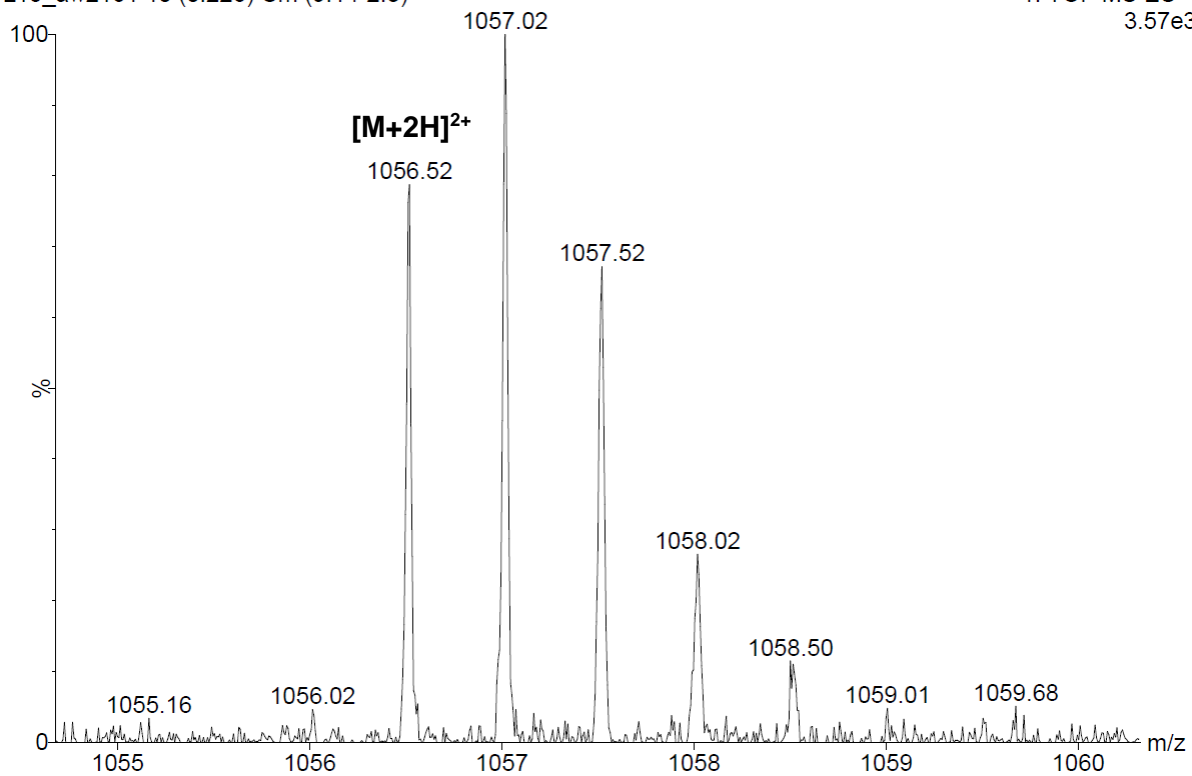

Supplement: Supplementary file [file 199240-1.pdf]
